# Supplementary material for: Eggs intake reduced the risk of osteoporosis in middle-aged and elderly chinese
Source: Research Square preprint supplement (doi:10.21203/rs.3.rs-4978505/v1), 2024-10-08
Supplement: Supplementary file 1 [file 4d29f55b6e76dad80a44dd6a.xlsx]

## Sheet: 上传
ldctid	name	sex	age	educati	EDUCATION	BMI	smoking	alcohol	exercise	egg	meat	veget	fruit	cereal	seafd	tuber	beans	nuts	garlic	fungus	tea	milk	yogurt	coffee	deliver	breastfeed	menopause	baseline	BMD_A	OP_A	是否OP_A	followup	随访时间间隔	OVCF	中重度OVCF	说明
P000001557	于继英	2	54	4	2	21.4844	1	1	2	2	2	2	2	2	2	2	2	2	2	2	1	2	1	1	2	2	2	2017-07-15	125.595	0	0	2020-07-12	1093	0	0
P000069447	范新丽	2	54	4	2	22.3133	1	1	1	1	1	2	2	1	1	1	1	2	1	2	2	1	1	1	1	#NULL!	2	2017-07-08	114.33	1	0	2020-07-05	1093	2	1	T7
P000094346	孙丽蓉	2	63	3	1	26.5643	1	1	2	2	2	2	2	2	2	2	2	2	2	2	1	2	2	1	2	2	2	2017-08-12	92.06	1	0	2020-11-15	1191	2	1	T12
P000103396	宋亚梅	2	54	4	2	24.3865	1	1	1	2	2	2	2	2	1	2	2	1	1	1	2	2	1	1	2	2	2	2017-11-12	93.92	1	0	2020-10-31	1084	2	1	T12
P000143332	于天燕	2	68	5	2	26.1719	1	1	2	2	1	2	2	2	2	1	1	1	1	1	1	1	1	1	2	2	2	2017-08-12	68.655	2	1	2020-11-14	1190	1	0
P000163320	李为民	1	65	3	1	23.6713	3	1	1	2	2	2	2	1	2	2	1	1	1	1	2	1	1	1	#NULL!	#NULL!	#NULL!	2017-07-01	86.695	1	0	2020-07-04	1099	1	0
P000163733	张照桂	2	62	4	2	24.0055	1	1	2	2	2	2	2	2	1	2	1	1	2	1	1	2	1	1	2	2	2	2017-11-04	65.335	2	1	2020-11-07	1099	1	0
P000171456	徐秀英	2	60	4	2	26.7094	1	1	2	2	2	2	2	2	1	2	2	2	2	2	1	1	1	1	2	2	2	2017-11-19	48	2	1	2020-11-07	1084	3	1	T12
P000179236	王金魁	1	72	5	2	25.8166	3	1	1	2	1	2	1	1	1	1	1	1	1	1	1	2	2	1	#NULL!	#NULL!	#NULL!	2019-11-02	90.235	1	0	2020-11-07	371	1	0
P000223417	杨俊华	2	58	4	2	22.6562	1	1	2	2	2	2	2	2	2	2	2	2	2	2	2	2	2	1	2	2	2	2017-08-06	139.72	0	0	2020-08-01	1091	0	0
P000251728	佟德啟	2	63	4	2	25.7117	1	1	1	2	2	2	2	2	2	2	2	2	1	1	1	1	1	1	2	2	2	2017-07-02	104.96	1	0	2020-07-05	1099	1	0
P000256322	杨广和	1	62	3	1	21.5139	2	1	1	2	2	2	2	2	2	2	2	2	2	2	1	1	1	1	#NULL!	#NULL!	#NULL!	2017-08-26	90.45	1	0	2020-08-22	1092	1	0	L
P000260469	袁月文	2	64	4	2	26.7698	1	1	2	2	1	2	2	2	1	1	2	2	2	1	2	2	1	2	2	2	2	2017-10-28	78.785	2	1	2020-10-31	1099	1	0	L
P000283335	郑瑜	2	44	4	2	24.8016	1	1	1	2	2	2	2	2	1	2	2	1	1	1	2	2	2	2	2	2	1	2018-06-26	148.2	0	0	2021-06-26	1095	0	0
P000286793	杜惠荣	2	59	4	2	23.4375	1	1	2	2	2	2	2	2	2	2	2	2	2	2	1	2	1	1	2	2	2	2017-07-15	80.08	1	0	2020-07-12	1093	1	0
P000290778	赵秀梅	2	54	4	2	24.4141	1	1	2	2	2	2	2	1	1	2	2	1	1	1	2	1	2	1	2	1	1	2017-08-05	119.175	1	0	2020-08-01	1092	1	0	T
P000296756	李伟英	2	70	4	2	23.4221	1	1	2	2	2	2	2	2	1	2	2	2	2	2	1	1	1	1	2	2	2	2017-07-22	53.24	2	1	2020-07-19	1093	2	1	T
P000305077	于惠芳	2	64	3	1	22.6562	1	1	1	2	2	2	2	2	2	2	2	2	2	2	1	2	1	1	2	1	2	2017-08-26	122.64	0	0	2020-08-22	1092	0	0
P000340778	谢银良	1	63	3	1	22.8374	2	1	1	2	2	2	1	1	1	1	1	1	2	1	1	1	1	1	#NULL!	#NULL!	#NULL!	2017-06-10	71.265	2	1	2020-06-20	1106	2	1
P000340794	周华	2	55	3	1	21.875	2	1	2	2	2	2	2	2	2	2	2	2	2	2	1	1	1	1	2	2	2	2017-06-10	136.135	0	0	2020-07-05	1121	0	0
P000340831	杨新颜	1	41	5	2	24.6914	1	1	1	2	2	2	1	1	1	1	2	1	2	2	1	2	2	1	#NULL!	#NULL!	#NULL!	2017-06-11	115.145	1	0	2020-12-05	1273	0	0
P000341982	薄书祥	1	66	4	2	23.6614	2	1	1	2	2	2	2	2	2	2	2	2	2	2	2	2	1	1	#NULL!	#NULL!	#NULL!	2017-06-17	72.275	2	1	2020-06-20	1099	1	0
P000341998	常进翠	2	58	3	1	24.6548	1	1	1	1	2	2	2	2	1	1	2	1	1	1	2	1	1	1	2	2	2	2017-06-17	131.355	0	0	2020-08-22	1162	0	0
P000342004	康建	1	62	5	2	23.6614	3	1	1	2	2	2	2	1	1	1	2	1	1	1	1	1	1	1	#NULL!	#NULL!	#NULL!	2017-06-17	106.23	1	0	2020-06-20	1099	0	0
P000342022	赵玉梅	2	59	3	1	18.3594	1	1	1	2	2	2	2	2	2	2	2	2	2	2	1	1	1	1	2	1	2	2017-06-18	139.165	0	0	2020-06-20	1098	0	0
P000342023	赵玉素	2	67	3	1	19.5312	1	1	2	2	2	2	2	2	2	2	2	2	2	2	1	1	1	1	2	2	2	2017-06-18	76.27	2	1	2020-06-20	1098	1	0	T
P000342046	陈云	1	68	5	2	24.3375	1	1	2	2	2	2	2	2	1	1	2	2	1	2	1	1	1	1	#NULL!	#NULL!	#NULL!	2017-06-18	139.435	0	0	2020-11-15	1246	0	0
P000342052	王晶	2	64	4	2	24.5578	1	1	2	2	2	2	2	2	2	2	2	2	2	2	1	1	1	1	2	2	2	2017-06-18	110.61	1	0	2020-12-05	1266	0	0
P000342064	徐惠敏	2	57	4	2	19.9594	1	1	1	2	1	2	2	1	2	1	2	1	2	2	1	1	1	1	2	1	2	2017-06-17	89.22	1	0	2020-07-18	1127	0	0
P000342068	杜运清	1	62	3	1	27.2173	1	1	1	1	1	2	1	2	1	1	2	1	2	2	1	1	1	1	#NULL!	#NULL!	#NULL!	2017-06-17	79.76	2	1	2020-11-15	1247	1	0
P000342104	康文梅	2	59	5	2	33.1504	1	1	2	2	1	2	2	2	1	1	1	2	2	1	1	1	1	1	2	2	2	2017-06-18	84.2	1	0	2020-06-20	1098	1	0
P000342107	魏国强	1	69	5	2	27.4406	3	2	1	2	2	2	2	2	2	2	2	2	2	1	2	1	1	1	#NULL!	#NULL!	#NULL!	2017-06-17	101.25	1	0	2020-11-15	1247	1	0
P000342120	樊三康	1	65	3	1	24.977	3	1	1	2	2	2	2	1	1	1	1	1	1	1	1	2	1	1	#NULL!	#NULL!	#NULL!	2017-06-18	123.03	0	0	2020-06-20	1098	0	0
P000343196	张继明	1	64	3	1	27.5482	2	1	1	1	1	1	1	1	1	1	1	1	1	1	1	1	1	1	#NULL!	#NULL!	#NULL!	2017-06-24	122.58	0	0	2020-06-20	1092	1	0
P000343197	李云年	2	61	4	2	23.939	1	1	1	2	2	2	2	1	1	1	1	1	1	1	1	2	1	1	2	2	2	2017-06-24	92.875	1	0	2020-11-15	1240	1	0
P000343200	于秀琴	2	52	3	1	25.6369	1	1	2	1	2	2	2	2	2	2	2	2	1	1	2	1	1	1	2	2	1	2017-06-24	86.265	1	0	2020-11-15	1240	0	0
P000343211	李秀芝	2	59	3	1	26.3702	1	1	1	2	2	2	2	2	1	1	1	1	1	1	1	1	1	1	2	2	2	2017-06-24	110.345	1	0	2020-11-15	1240	1	0
P000343246	孙连喜	1	64	4	2	26.8274	1	1	2	2	2	2	2	2	2	2	2	2	2	1	1	1	1	1	#NULL!	#NULL!	#NULL!	2017-06-24	140.97	0	0	2018-09-08	441	0	0
P000343252	傅世奎	1	62	3	1	25.4694	2	1	1	2	2	2	2	2	2	2	2	2	2	2	1	1	1	1	#NULL!	#NULL!	#NULL!	2017-06-24	70.23	2	1	2020-06-20	1092	2	1
P000343265	范宝桐	1	63	3	1	26.5118	2	2	1	2	2	2	1	1	2	2	2	2	2	2	1	1	1	1	#NULL!	#NULL!	#NULL!	2017-06-24	48.925	2	1	2020-06-20	1092	1	0
P000343276	翟环珠	2	59	3	1	21.4844	1	1	1	2	2	2	2	2	1	1	2	1	2	1	2	1	1	1	2	2	2	2017-06-24	99.095	1	0	2020-07-05	1107	1	0
P000343289	马启群	1	64	3	1	19.0311	1	1	2	2	2	2	2	2	1	1	2	1	1	1	1	1	1	1	#NULL!	#NULL!	#NULL!	2017-06-25	109.325	1	0	2020-06-21	1092	0	0
P000343324	赵建英	2	66	3	1	23.8281	1	1	1	2	2	2	2	2	2	2	2	2	2	2	1	2	1	1	2	2	2	2017-06-24	28.905	2	1	2020-06-20	1092	2	1	T
P000343396	张起整	2	69	5	2	20.9366	1	1	2	2	1	2	2	2	2	2	2	2	2	2	1	1	1	1	2	2	2	2017-06-25	67.025	2	1	2020-11-07	1231	1	0
P000343428	冯光瑜	1	54	5	2	24.0741	1	1	1	2	2	2	2	2	1	2	2	1	1	2	2	1	1	1	#NULL!	#NULL!	#NULL!	2017-06-24	133.26	0	0	2020-11-15	1240	1	0
P000344446	董红	2	51	5	2	24.4646	1	1	2	2	2	2	2	1	1	1	1	2	2	2	2	2	1	2	2	2	2	2017-07-01	131.915	0	0	2020-07-04	1099	0	0
P000344489	付贵成	1	62	3	1	20.2812	2	2	1	2	2	1	1	1	1	1	1	2	2	2	2	1	1	1	#NULL!	#NULL!	#NULL!	2017-07-01	107	1	0	2020-07-11	1106	1	0
P000344499	臧广芝	2	62	3	1	25.6874	1	1	1	2	2	2	2	2	2	2	2	2	2	2	1	1	1	1	2	2	2	2017-07-01	81.16	1	0	2020-07-05	1100	1	0
P000344502	杜守温	1	61	5	2	22.0932	1	2	1	2	2	2	2	2	2	2	2	2	2	2	1	2	2	1	#NULL!	#NULL!	#NULL!	2017-07-01	126.745	0	0	2018-07-29	393	0	0
P000344518	田建国	1	64	3	1	25.6489	2	1	1	2	2	1	2	2	1	2	2	2	2	2	1	1	1	1	#NULL!	#NULL!	#NULL!	2017-07-01	79.09	2	1	2020-11-15	1233	0	0
P000344519	张文成	1	57	4	2	22.7903	3	1	2	2	2	2	2	1	1	1	1	1	1	1	2	1	1	1	#NULL!	#NULL!	#NULL!	2018-03-23	106.2	1	0	2021-03-21	1093	0	0
P000344532	刘建和	1	68	4	2	22.1297	1	1	2	2	2	2	2	2	2	2	2	2	2	2	1	1	1	1	#NULL!	#NULL!	#NULL!	2017-07-02	143.72	0	0	2020-07-05	1099	1	0
P000344537	贾锁春	2	59	3	1	23.1911	1	1	2	2	2	2	2	2	2	2	2	2	2	2	1	2	1	1	2	2	2	2017-07-02	100.985	1	0	2020-07-05	1099	1	0
P000344538	段永华	1	59	5	2	25.4694	2	1	2	2	2	2	2	2	2	2	2	2	2	2	2	1	1	1	#NULL!	#NULL!	#NULL!	2017-07-02	72.94	2	1	2020-07-05	1099	2	1	T8
P000344553	田淑敏	2	65	3	1	25.3906	1	1	2	1	1	2	1	1	1	1	2	2	1	1	1	1	1	1	2	2	2	2017-07-02	61.985	2	1	2020-07-05	1099	1	0
P000344554	田以新	2	69	4	2	28.9062	1	1	2	2	2	2	2	2	2	2	2	2	2	2	2	2	1	1	1	#NULL!	2	2017-07-02	88.26	1	0	2020-07-05	1099	1	0
P000344555	王宝娟	2	62	3	1	24.8358	1	1	2	2	2	2	2	2	2	2	2	2	2	2	1	2	1	1	2	2	2	2017-07-02	81.57	1	0	2020-07-05	1099	0	0
P000344556	姚黎明	1	62	3	1	22.4913	2	1	2	2	2	2	2	2	2	2	2	2	2	2	1	1	1	1	#NULL!	#NULL!	#NULL!	2017-07-02	72.79	2	1	2020-07-05	1099	2	1	T
P000344560	王玉珍	2	67	5	2	28.3447	1	1	2	2	2	2	2	2	2	2	2	2	2	2	2	2	1	2	2	2	2	2017-07-02	92.875	1	0	2020-07-05	1099	0	0
P000344580	高红红	2	49	5	2	18.9844	1	1	2	1	2	2	1	1	1	1	2	1	1	1	2	1	1	1	2	2	1	2017-07-01	146.015	0	0	2020-07-19	1114	0	0
P000344583	刘瑞华	2	63	4	2	19.9594	1	1	2	1	2	2	1	2	2	1	2	1	1	1	1	1	1	1	2	2	2	2017-07-01	69.985	2	1	2018-08-12	407	1	0
P000344590	王景山	1	67	3	1	24.5693	3	2	1	2	2	2	2	2	2	2	2	1	1	2	1	1	1	1	#NULL!	#NULL!	#NULL!	2017-07-02	40.91	2	1	2020-07-05	1099	3	1	L3
P000344605	刘印淑	2	51	5	2	25.7812	1	1	2	2	2	2	2	2	1	1	2	2	2	2	1	1	2	1	2	2	2	2017-07-01	121.785	0	0	2020-07-05	1100	0	0
P000344607	王桂荣	2	63	3	1	31.6158	1	1	1	2	2	2	2	2	2	2	2	2	2	2	2	2	2	1	2	2	2	2017-07-01	139.84	0	0	2020-11-15	1233	0	0
P000344612	尹如芬	2	65	3	1	28.6501	1	1	1	2	2	2	2	1	1	1	2	1	1	1	1	1	1	1	2	2	2	2017-07-01	82.05	1	0	2020-07-05	1100	1	0
P000344625	高钜林	1	71	4	2	24.7676	2	1	1	2	2	2	2	2	1	1	1	1	1	1	2	1	1	1	#NULL!	#NULL!	#NULL!	2017-07-08	45.14	2	1	2020-07-05	1093	1	0
P000344635	郭运来	1	71	5	2	26.6749	2	2	2	2	2	2	2	2	2	2	2	2	2	2	2	1	1	1	#NULL!	#NULL!	#NULL!	2017-07-02	80.715	1	0	2020-07-05	1099	1	0
P000344642	张瑜	1	63	3	1	26.4236	3	1	2	2	2	2	1	2	2	2	2	2	1	1	2	2	1	1	#NULL!	#NULL!	#NULL!	2017-07-02	89.13	1	0	2020-07-05	1099	1	0
P000344650	尚洪芳	2	64	3	1	25.3906	1	1	1	2	2	2	2	2	2	2	2	2	2	2	1	2	1	1	2	1	2	2017-07-02	55.335	2	1	2020-11-15	1232	1	0
P000344653	孔令珍	2	62	4	2	22.7615	1	1	1	2	2	2	2	1	2	1	2	1	2	1	1	1	1	1	2	2	2	2017-07-02	98.65	1	0	2020-07-05	1099	1	0
P000344656	郝仲陶	2	62	5	2	37.7229	1	1	1	2	1	2	2	2	2	1	2	2	1	1	1	2	1	1	1	#NULL!	2	2017-07-02	73.62	2	1	2020-07-05	1099	1	0
P000344658	郝孟桃	2	63	5	2	19.1953	1	1	2	2	1	2	2	2	2	2	2	2	2	2	1	2	2	1	2	1	2	2017-07-02	83.63	1	0	2020-07-05	1099	1	0
P000344662	王巍	2	42	5	2	25.9107	1	1	1	2	2	2	2	2	1	1	2	2	2	2	2	2	2	1	2	2	1	2017-07-02	163.825	0	0	2020-07-05	1099	0	0
P000344737	王洪英	2	51	3	1	25.7812	2	2	2	2	2	2	2	2	2	2	2	2	2	2	2	1	1	1	2	2	1	2017-07-01	164.42	0	0	2020-11-15	1233	0	0
P000345796	路广廉	1	61	4	2	22.4913	2	2	1	2	2	2	2	2	2	2	2	2	2	2	1	1	1	1	#NULL!	#NULL!	#NULL!	2017-07-08	128.355	0	0	2020-07-05	1093	0	0
P000345798	马玉芬	2	60	3	1	21.3599	1	1	1	1	1	2	2	1	1	1	1	1	1	1	1	1	1	1	2	2	2	2017-07-08	118.415	1	0	2020-07-05	1093	1	0
P000345805	国爱萍	2	56	5	2	20.8209	1	1	2	2	2	2	2	2	2	2	2	2	2	2	2	1	1	2	2	2	2	2017-07-08	128.375	0	0	2020-07-05	1093	0	0
P000345806	李桂明	2	71	3	1	27.6817	1	1	2	2	2	2	2	2	2	2	2	2	2	2	1	1	1	1	1	#NULL!	2	2017-07-08	68.655	2	1	2020-11-15	1226	1	0
P000345810	郭军	2	63	2	1	19.1406	1	1	2	2	2	2	2	2	1	2	2	2	2	2	1	1	1	1	2	2	2	2017-07-08	94.005	1	0	2020-07-05	1093	1	0
P000345811	史清瑞	1	62	3	1	23.6614	2	1	1	2	2	2	2	2	1	2	2	2	2	2	1	1	1	1	#NULL!	#NULL!	#NULL!	2017-07-08	88.795	1	0	2020-07-05	1093	1	0
P000345815	王全福	1	54	3	1	29.9836	1	1	2	2	2	2	2	2	2	2	2	2	2	2	1	1	1	1	#NULL!	#NULL!	#NULL!	2017-07-08	105.33	1	0	2020-11-14	1225	2	1	L1
P000345821	刘青	1	47	5	2	21.1463	2	1	1	2	2	2	2	2	2	2	2	1	1	1	1	2	1	1	#NULL!	#NULL!	#NULL!	2017-07-08	90.5	1	0	2020-07-11	1099	1	0
P000345822	陈秀华	2	61	4	2	19.5312	1	1	2	2	2	2	2	2	1	2	2	2	2	2	1	1	1	1	2	2	2	2017-07-08	38.805	2	1	2020-07-05	1093	2	1	TL
P000345835	何全喜	2	60	4	2	27.3438	1	1	2	2	1	2	2	2	1	1	2	1	1	1	1	1	1	1	2	2	2	2017-07-08	89.75	1	0	2020-07-05	1093	1	0
P000345847	吴建忠	1	63	4	2	27.6817	1	2	2	2	2	2	2	2	1	2	1	1	1	1	2	1	1	1	#NULL!	#NULL!	#NULL!	2017-07-15	93.68	1	0	2020-07-12	1093	3	1
P000345856	崔秀芝	2	62	4	2	23.6614	1	1	1	2	2	2	2	2	2	2	2	2	2	2	1	1	1	1	2	2	2	2017-07-08	79.79	2	1	2020-07-05	1093	2	1	TL
P000345857	陈慧娴	2	57	2	1	22.4813	1	1	1	1	2	2	2	2	2	2	2	2	1	1	1	2	1	1	2	2	2	2017-07-08	76.825	2	1	2020-07-05	1093	1	0
P000345860	姚慧凤	2	57	4	2	21.4844	1	1	2	2	2	2	2	2	2	2	2	2	2	1	1	1	2	1	2	2	2	2017-07-08	55.245	2	1	2020-11-14	1225	2	1	T12
P000345861	陈秀凤	2	70	2	1	29.0174	1	1	1	2	2	2	2	2	2	2	2	1	1	1	1	1	1	1	2	2	2	2017-07-08	72.235	2	1	2020-07-05	1093	1	0
P000345871	单锡武	1	64	4	2	28.7347	2	1	2	2	2	2	2	2	1	2	2	2	2	2	1	1	1	1	#NULL!	#NULL!	#NULL!	2017-07-09	108.96	1	0	2020-07-25	1112	1	0
P000345873	孙向荣	2	64	3	1	23.0469	1	1	2	2	2	2	2	2	2	2	2	2	2	2	1	1	1	1	2	1	2	2017-07-09	106.34	1	0	2020-07-25	1112	1	0
P000345889	章启峰	2	56	4	2	26.7094	1	1	2	2	2	2	2	2	2	2	2	2	2	2	1	1	1	1	2	2	2	2017-07-09	155.515	0	0	2020-07-12	1099	0	0
P000345890	田建国	1	60	4	2	25.9516	1	1	2	2	2	2	2	2	2	2	2	2	2	2	1	1	1	1	#NULL!	#NULL!	#NULL!	2017-07-09	122.855	0	0	2020-07-12	1099	1	0	TL
P000345935	杨德祥	1	62	3	1	21.1827	2	2	2	2	2	2	2	2	2	2	2	2	2	2	2	2	1	1	#NULL!	#NULL!	#NULL!	2017-07-08	61.495	2	1	2020-07-12	1100	3	1
P000345936	任立秋	2	61	3	1	23.4375	1	1	2	2	2	2	2	2	1	1	2	1	1	1	2	1	2	1	2	2	2	2017-07-08	118.485	1	0	2020-07-12	1100	1	0
P000345937	李华	2	51	4	2	27.0389	1	1	2	2	2	2	2	2	1	1	2	1	1	1	2	1	1	1	2	2	1	2017-07-15	127.41	0	0	2020-07-12	1093	0	0
P000345945	丁银良	1	72	4	2	26.2346	2	1	2	2	1	2	2	1	2	1	2	1	2	1	2	1	1	1	#NULL!	#NULL!	#NULL!	2017-07-08	69.125	2	1	2020-11-15	1226	1	0
P000345954	吕宏江	1	62	4	2	32.0503	3	2	1	2	2	2	2	1	1	2	1	1	1	2	2	1	1	1	#NULL!	#NULL!	#NULL!	2017-07-08	67.445	2	1	2020-07-05	1093	1	0
P000345955	刘华明	2	57	4	2	27.7902	1	2	2	2	2	2	2	1	1	1	1	1	1	1	1	1	2	1	2	2	2	2017-07-08	107.125	1	0	2020-07-05	1093	0	0
P000345967	王丽	2	65	4	2	19.6283	1	1	1	2	2	2	2	2	2	2	2	2	2	1	1	2	1	1	2	2	2	2017-07-08	105.615	1	0	2020-07-12	1100	1	0	T
P000345973	张甲春	1	67	4	2	24.2215	2	1	1	1	1	2	1	1	2	1	1	1	1	1	2	1	1	1	#NULL!	#NULL!	#NULL!	2017-07-08	64.57	2	1	2020-07-12	1100	2	1
P000346014	阚志强	1	63	4	2	27.7551	1	2	2	2	1	2	2	2	1	1	1	1	1	1	2	2	2	2	#NULL!	#NULL!	#NULL!	2017-07-09	91.915	1	0	2020-08-12	1130	0	0
P000346073	庞娜	2	58	4	2	27.5482	1	1	1	2	2	2	2	2	2	2	2	2	2	2	1	1	1	1	2	1	2	2017-07-09	83.91	1	0	2020-07-12	1099	1	0
P000347035	胡秀影	2	65	3	1	22.2656	1	1	2	2	2	2	2	2	2	2	2	2	2	2	1	1	1	1	2	1	2	2017-07-15	90.245	1	0	2020-07-12	1093	0	0
P000347036	王淑华	2	64	5	2	19.487	1	1	1	1	1	2	2	2	1	1	2	1	1	1	2	1	1	1	2	2	2	2017-07-16	65.68	2	1	2020-07-18	1098	1	0
P000347042	张凤明	1	68	4	2	25.7117	1	1	2	2	2	2	2	2	2	2	2	1	1	1	1	1	1	1	#NULL!	#NULL!	#NULL!	2017-07-15	133.61	0	0	2020-07-12	1093	1	0
P000347043	王美玉	2	68	3	1	23.1473	1	1	2	2	2	2	2	2	2	2	2	1	1	1	1	1	2	1	2	2	2	2017-07-15	38.02	2	1	2020-07-12	1093	1	0
P000347049	付秀英	2	61	3	1	23.4375	1	1	1	2	2	2	2	2	2	2	2	2	2	2	1	1	1	1	2	2	2	2017-07-15	84.065	1	0	2020-07-12	1093	0	0
p000347060	刘凤云	2	62	4	2	24.0238	1	1	2	1	1	2	2	2	1	1	2	2	1	1	1	2	1	1	2	2	2	2017-07-15	47.085	2	1	2020-11-15	1219	2	1	T
P000347061	乙美华	2	63	4	2	22.7732	1	1	2	2	2	2	2	2	2	2	2	2	2	2	1	2	1	1	1	2	2	2017-07-15	98.425	1	0	2020-07-12	1093	1	0
P000347064	夏宝华	1	59	5	2	26.7299	2	1	1	2	2	2	2	2	2	2	2	2	2	2	2	1	1	1	#NULL!	#NULL!	#NULL!	2017-07-15	57.435	2	1	2020-07-12	1093	2	1	TL
P000347071	丁四明	1	65	5	2	27.6817	2	1	2	2	2	2	2	2	2	2	2	1	1	1	1	1	1	1	#NULL!	#NULL!	#NULL!	2017-07-15	55.835	2	1	2020-07-12	1093	3	1
P000347073	李晓凤	2	60	5	2	25.3906	1	1	1	2	2	2	2	2	2	2	2	2	2	1	1	1	1	1	2	1	2	2017-07-15	93.005	1	0	2020-07-12	1093	1	0
P000347076	肖铭仲	1	60	4	2	25.1024	2	1	2	2	2	2	2	2	2	2	2	2	2	2	1	1	2	1	#NULL!	#NULL!	#NULL!	2017-07-15	164.59	0	0	2020-07-12	1093	0	0
P000347077	张新光	1	46	4	2	30.8293	1	1	2	2	2	2	2	2	2	2	2	1	1	1	1	2	1	1	#NULL!	#NULL!	#NULL!	2017-07-15	168.605	0	0	2020-07-12	1093	0	0
P000347080	曹治河	1	53	4	2	27.7634	1	2	1	2	2	2	2	2	2	2	2	2	2	2	1	1	1	1	#NULL!	#NULL!	#NULL!	2017-07-15	96.18	1	0	2020-11-15	1219	0	0
P000347085	高超	2	59	4	2	26.0262	1	1	1	2	2	2	2	2	2	2	2	2	2	2	1	1	2	1	2	1	2	2017-07-15	129.41	0	0	2020-07-12	1093	0	0
P000347086	宋广林	1	60	3	1	25.8264	3	1	2	2	2	1	1	2	2	2	2	2	2	2	1	1	1	1	#NULL!	#NULL!	#NULL!	2017-07-15	188.135	0	0	2020-07-12	1093	0	0
P000347088	王燕桥	2	55	5	2	28.6851	1	1	2	2	2	2	2	2	2	2	2	1	1	1	1	1	2	1	2	2	2	2017-07-15	150.005	0	0	2020-07-12	1093	0	0
P000347091	李培忠	1	54	5	2	30.8642	2	1	2	2	2	2	2	2	2	2	2	2	2	2	2	1	1	1	#NULL!	#NULL!	#NULL!	2017-07-15	177.6	0	0	2020-07-12	1093	1	0
P000347100	秦焕新	2	61	4	2	27.0516	1	1	1	2	2	2	2	2	1	2	2	2	2	2	1	1	1	1	2	2	2	2017-07-15	77.58	2	1	2020-07-12	1093	1	0
P000347101	兰燕沛	1	65	5	2	21.4692	2	1	2	1	1	2	2	1	1	1	1	1	1	1	2	2	1	1	#NULL!	#NULL!	#NULL!	2017-07-15	74.365	2	1	2020-07-12	1093	1	0
P000347102	房恩荣	2	61	3	1	26.5731	1	1	1	2	2	2	2	2	2	2	2	2	2	2	1	2	1	1	1	#NULL!	2	2017-07-15	57.67	2	1	2020-07-12	1093	2	1
P000347105	张瑞莲	2	53	4	2	25.7117	1	1	2	2	2	2	2	2	1	2	2	1	1	1	2	2	1	1	2	2	2	2017-07-15	92.485	1	0	2020-07-12	1093	0	0
P000347106	彭增友	1	69	5	2	23.7228	1	1	1	2	1	2	2	2	1	1	2	1	1	1	2	1	1	1	#NULL!	#NULL!	#NULL!	2017-07-15	58.155	2	1	2020-07-12	1093	1	0
P000347107	于春生	2	67	3	1	24.4561	1	1	2	2	1	2	2	2	1	1	2	1	1	1	2	1	1	1	2	2	2	2017-07-15	116.515	1	0	2020-11-15	1219	1	0	T
P000347111	苗文英	2	60	3	1	21.2306	1	1	2	2	2	2	2	2	2	2	2	2	2	2	1	1	1	1	2	1	2	2017-07-15	96.9	1	0	2020-07-12	1093	1	0
P000347112	冯连润	2	60	4	2	25.1532	1	1	2	2	2	2	2	2	2	2	2	2	2	2	1	1	2	1	2	1	2	2017-07-15	85.685	1	0	2020-07-12	1093	0	0
P000347117	杨唯红	2	54	4	2	21.4844	2	2	1	2	2	2	2	2	2	2	2	1	1	1	1	1	2	1	2	1	2	2017-07-15	83.93	1	0	2020-07-12	1093	1	0
P000347118	庞秀芬	2	60	4	2	26.6728	1	1	1	2	2	2	2	2	2	2	2	2	2	2	1	1	2	1	2	2	2	2017-07-15	100.305	1	0	2020-07-12	1093	0	0
P000347127	侯平	2	57	4	2	23.0469	1	1	2	2	2	2	2	2	1	2	2	2	2	2	1	1	1	1	2	2	2	2017-07-16	123.48	0	0	2020-07-12	1092	1	0
P000347136	高培文	2	64	4	2	25.7117	1	1	1	2	2	2	2	2	1	1	2	1	1	1	1	2	1	1	2	2	2	2017-07-16	110.96	1	0	2020-07-12	1092	0	0
P000347140	陈树元	1	64	3	1	21.3839	2	2	2	2	2	2	2	2	2	2	2	1	1	1	2	1	1	1	#NULL!	#NULL!	#NULL!	2017-07-16	151.1	0	0	2020-11-15	1218	0	0
P000347141	马玉珍	2	61	3	1	19.9792	1	1	2	2	2	2	2	2	2	2	2	2	2	2	1	2	1	1	1	#NULL!	2	2017-07-16	54.055	2	1	2020-07-18	1098	2	1
P000347148	庄希环	2	45	5	2	24.8016	1	1	1	2	2	2	2	2	2	2	2	2	2	2	2	1	1	1	2	2	1	2017-07-16	194.25	0	0	2020-07-18	1098	0	0
P000347154	王樱桃	2	62	3	1	25.3902	1	1	1	2	2	2	2	2	2	2	2	2	2	1	1	1	1	1	2	2	2	2017-07-16	93.355	1	0	2020-07-18	1098	3	1
P000347155	吴建伟	1	62	5	2	28.578	2	1	1	2	2	2	2	2	2	2	2	2	1	1	1	1	1	1	#NULL!	#NULL!	#NULL!	2017-07-16	94.69	1	0	2020-07-18	1098	1	0
P000347159	谢雅琴	2	72	4	2	25.2994	1	1	1	2	2	2	2	2	2	2	2	2	1	1	2	1	1	1	2	2	2	2017-07-16	72.73	2	1	2020-07-18	1098	2	1
P000347172	李建新	2	48	5	2	22.5827	1	1	2	2	2	2	2	2	1	1	1	1	1	1	2	1	2	1	1	#NULL!	2	2017-07-15	161.97	0	0	2020-07-12	1093	0	0
P000347177	张秀芬	2	64	4	2	22.5827	1	1	1	2	1	1	2	2	1	1	1	1	1	1	1	1	1	1	2	2	2	2017-07-15	114.74	1	0	2020-07-12	1093	0	0
P000347179	杨大顺	1	60	4	2	24.6914	2	2	2	1	2	2	1	2	1	2	2	1	1	1	2	1	1	1	#NULL!	#NULL!	#NULL!	2017-07-15	100.865	1	0	2020-07-12	1093	1	0
P000347183	王玉英	2	68	3	1	21.4844	1	1	1	2	2	2	2	2	2	2	2	2	2	2	2	1	2	2	2	1	2	2017-07-15	74.88	2	1	2020-07-12	1093	0	0
P000347186	王贵臣	1	54	5	2	24.4898	3	1	1	2	2	2	2	2	1	1	1	1	1	1	1	1	1	1	#NULL!	#NULL!	#NULL!	2017-07-15	82.87	1	0	2020-08-01	1113	1	0	TL
P000347203	王强	1	58	4	2	24.2215	2	2	2	1	1	2	2	1	1	1	1	1	1	1	1	1	1	1	#NULL!	#NULL!	#NULL!	2017-07-15	99.79	1	0	2020-07-12	1093	0	0
P000347214	韩荣琴	2	62	3	1	26.079	1	1	2	2	1	2	2	2	1	1	2	1	2	1	1	1	2	1	2	2	2	2017-07-15	82.035	1	0	2020-07-12	1093	1	0
P000347221	王俊生	1	62	5	2	23.3564	1	2	2	2	2	2	2	2	1	2	2	2	1	2	1	1	2	1	#NULL!	#NULL!	#NULL!	2017-07-15	141.315	0	0	2020-11-15	1219	0	0
P000347223	王淑宜	2	72	5	2	21.875	1	1	1	2	2	2	2	1	1	1	1	1	1	1	1	2	1	1	2	1	2	2017-07-15	78.37	2	1	2020-07-12	1093	1	0
P000347225	王秋宜	2	67	5	2	24.8889	1	1	2	2	2	2	2	2	1	2	2	1	1	1	1	1	2	1	2	1	2	2017-07-15	55.25	2	1	2020-07-12	1093	2	1
P000347226	张建文	2	62	3	1	31.25	1	1	2	2	2	2	2	2	1	1	2	2	1	2	1	2	2	1	2	1	2	2017-07-22	77.89	2	1	2020-07-19	1093	1	0
P000347228	王蓉蓉	2	68	5	2	22.719	1	1	2	2	2	2	2	2	1	1	2	1	2	1	2	1	2	1	2	2	2	2017-07-15	42.17	2	1	2020-07-12	1093	1	0
P000347230	李凤武	1	62	4	2	22.8625	2	2	2	2	2	2	2	2	1	2	2	2	1	1	2	1	1	1	#NULL!	#NULL!	#NULL!	2017-07-15	38.445	2	1	2020-07-12	1093	2	1
P000347253	姚文琪	1	66	4	2	27.4145	1	1	2	2	2	2	2	2	2	2	2	2	2	2	2	1	1	1	#NULL!	#NULL!	#NULL!	2017-07-16	112.015	1	0	2020-11-15	1218	0	0
P000347259	崔雁鸣	1	63	5	2	24.2215	2	1	2	1	1	2	2	1	2	1	1	1	1	1	1	1	1	1	#NULL!	#NULL!	#NULL!	2017-07-16	65.24	2	1	2020-07-12	1092	0	0
P000347305	张岳	1	43	5	2	26.5731	1	1	1	2	2	2	2	2	2	2	2	2	2	2	2	1	1	1	#NULL!	#NULL!	#NULL!	2017-07-15	149.56	0	0	2020-07-12	1093	0	0
p000347318	滕锦华	1	66	4	2	30.8594	1	2	2	2	2	2	2	2	2	2	2	2	2	2	2	1	2	2	#NULL!	#NULL!	#NULL!	2017-07-15	119.48	1	0	2020-11-15	1219	1	0
P000347348	马宝勤	1	66	4	2	19.487	1	1	1	2	2	2	2	2	2	2	2	2	2	1	1	1	1	1	#NULL!	#NULL!	#NULL!	2017-07-16	117.965	1	0	2020-11-15	1218	1	0	L1
P000347349	王志英	2	66	3	1	18.026	1	1	2	2	2	2	2	2	1	2	2	2	2	2	1	1	1	1	2	2	2	2017-07-16	79.49	2	1	2020-07-18	1098	0	0
P000348348	聂玉敏	2	52	3	1	37.7778	1	1	2	2	2	2	2	2	1	2	2	2	2	2	1	1	1	1	2	2	2	2017-07-22	95.28	1	0	2020-07-05	1079	1	0
P000348352	东俊林	1	62	3	1	23.1206	2	2	2	2	2	2	2	2	2	2	2	2	2	2	1	1	1	1	#NULL!	#NULL!	#NULL!	2017-07-08	85.365	1	0	2020-07-05	1093	2	1	T12
P000348358	顾学伟	2	54	4	2	29.7458	1	1	2	2	2	2	2	2	2	2	2	1	1	1	1	1	1	1	2	2	2	2017-07-22	104.715	1	0	2020-07-18	1092	0	0
P000348359	郭玉社	1	59	4	2	32.2831	3	1	1	2	2	2	2	2	1	1	2	2	2	2	2	2	1	1	#NULL!	#NULL!	#NULL!	2017-07-22	110.575	1	0	2020-07-18	1092	1	0
P000348360	孙雅爱	2	60	5	2	19.7599	1	1	2	2	2	2	2	2	1	2	2	2	2	2	1	1	1	1	2	2	2	2017-07-22	102.005	1	0	2020-07-18	1092	1	0
P000348361	赵俊芳	2	61	3	1	26.1224	1	1	1	2	2	2	2	2	1	1	1	1	1	1	1	1	1	1	2	2	2	2017-07-22	105.42	1	0	2020-07-19	1093	1	0
P000348362	王桂珍	2	59	4	2	28.1969	2	1	1	1	1	2	1	2	1	1	1	1	1	1	1	1	1	2	2	2	2	2017-07-22	67.285	2	1	2020-07-25	1099	2	1	L1-2
P000348364	庞鑫	2	43	5	2	23.4375	1	1	1	2	2	2	2	2	2	2	2	1	1	1	2	1	2	1	1	#NULL!	1	2017-07-22	141.275	0	0	2020-07-19	1093	0	0
P000348366	刘金岺	2	70	4	2	20.3125	1	1	2	1	1	2	2	1	1	1	2	2	1	2	1	1	1	1	2	2	2	2017-07-22	77.245	2	1	2020-07-26	1100	0	0
P000348369	曾晓东	2	51	4	2	23.1405	1	1	2	2	2	2	2	2	2	2	2	2	2	2	2	2	2	1	2	2	2	2017-07-22	179.825	0	0	2020-07-18	1092	0	0
P000348372	李益人	1	70	3	1	27.5482	1	2	2	2	2	1	1	2	1	1	2	1	2	2	1	1	1	1	#NULL!	#NULL!	#NULL!	2017-07-22	70.315	2	1	2020-07-19	1093	1	0	T
P000348379	戴秀英	2	71	3	1	22.3081	1	1	2	2	1	2	2	2	1	2	2	1	1	1	1	1	1	1	2	2	2	2017-07-22	46.64	2	1	2020-07-19	1093	1	0
P000348381	朱景敏	2	64	5	2	25.8876	1	1	2	2	2	2	2	2	2	2	2	2	2	2	1	1	1	1	2	1	2	2017-07-22	91.75	1	0	2020-07-26	1100	2	1	T 非新发
P000348384	姜树银	2	72	5	2	21.4573	1	1	2	2	2	2	2	2	1	2	2	1	1	1	1	1	1	1	2	2	2	2017-07-22	105.34	1	0	2020-07-19	1093	1	0
P000348385	李胜年	1	72	5	2	17.9282	1	1	2	2	2	2	2	2	1	2	2	2	1	1	2	2	1	1	#NULL!	#NULL!	#NULL!	2017-07-22	150.735	0	0	2020-07-19	1093	1	0
P000348401	李东明	1	74	3	1	26.8136	3	1	1	1	1	2	2	2	1	1	1	1	1	2	1	1	1	1	#NULL!	#NULL!	#NULL!	2017-07-30	71.835	2	1	2020-07-25	1091	1	0
P000348402	肖凤珍	2	65	5	2	18.4911	1	1	1	1	1	2	2	1	1	1	1	1	1	1	2	1	1	1	2	2	2	2017-07-22	69.895	2	1	2020-07-19	1093	1	0	T
P000348403	张勇峰	1	65	3	1	20.0474	1	1	1	1	1	2	2	1	1	1	2	1	1	2	1	1	1	1	#NULL!	#NULL!	#NULL!	2017-07-22	144.47	0	0	2020-07-19	1093	1	0	TL
P000348404	贾新孚	1	61	4	2	20.0474	2	1	1	2	2	2	2	2	2	2	2	2	2	2	1	1	1	2	#NULL!	#NULL!	#NULL!	2017-07-22	108.885	1	0	2020-07-19	1093	1	0
P000348414	马桂英	2	58	4	2	24.4561	1	1	2	2	2	2	2	2	2	2	2	2	2	2	1	2	1	1	2	2	2	2017-08-12	64.885	2	1	2020-08-02	1086	1	0	T
P000348419	回丽华	2	61	4	2	23.5883	1	1	1	2	2	2	2	2	2	2	2	2	2	2	1	1	2	1	2	2	2	2017-07-23	101.515	1	0	2020-07-25	1098	0	0
P000348420	李东坦	1	66	5	2	25.0574	3	1	2	2	2	2	2	2	2	2	2	2	2	2	1	1	1	1	#NULL!	#NULL!	#NULL!	2017-08-12	65.37	2	1	2020-08-02	1086	2	1	TL 陈旧
P000348421	梁惠	2	55	4	2	26.5625	1	1	1	2	2	2	2	2	2	2	2	2	2	2	1	1	1	2	2	2	2	2017-07-23	147.555	0	0	2020-08-02	1106	0	0
P000348422	李崇礼	1	67	5	2	25.0593	2	2	2	2	2	2	2	2	2	2	2	2	2	2	2	2	2	2	#NULL!	#NULL!	#NULL!	2017-07-23	109.995	1	0	2020-07-19	1092	2	1	T11
P000348423	张庆山	1	63	5	2	22.2041	1	1	1	2	2	2	2	2	2	2	2	2	2	2	1	1	1	1	#NULL!	#NULL!	#NULL!	2017-08-06	88.38	1	0	2020-08-01	1091	0	0
P000348424	李啟凤	2	65	3	1	33.3333	1	1	1	2	2	2	2	2	2	2	2	1	1	1	1	1	1	1	2	2	2	2017-07-23	55.72	2	1	2020-07-19	1092	1	0
P000348430	杨玉荣	2	59	3	1	28.0404	1	1	2	2	2	2	2	2	2	2	2	1	1	1	2	2	1	1	2	1	2	2017-07-23	59.87	2	1	2020-07-19	1092	2	1	T11
P000348433	孙春兰	2	53	4	2	29.7442	1	1	1	2	2	2	2	2	2	2	2	1	1	1	2	2	1	1	2	2	2	2017-07-23	144.98	0	0	2020-07-19	1092	1	0	TL
P000348436	朱益敏	2	56	4	2	26.3465	1	1	1	2	2	2	2	2	2	2	2	2	2	2	1	2	2	1	2	2	2	2017-08-05	151.575	0	0	2020-08-01	1092	0	0
P000348437	庞玉光	1	51	4	2	28.4053	2	2	2	2	2	2	2	2	2	2	2	1	1	1	1	1	1	1	#NULL!	#NULL!	#NULL!	2017-07-23	133.685	0	0	2020-07-19	1092	0	0
P000348438	高天凡	1	54	5	2	22.921	2	2	1	2	2	2	2	2	2	2	2	2	2	2	1	1	1	2	#NULL!	#NULL!	#NULL!	2017-07-23	81.72	1	0	2020-07-19	1092	1	0	TL
P000348441	冯建和	1	72	3	1	23.1206	1	2	2	2	2	2	2	2	2	2	2	2	1	1	1	1	1	1	#NULL!	#NULL!	#NULL!	2017-07-23	60.83	2	1	2020-07-19	1092	1	0	L1
P000348442	杨之妍	2	72	3	1	23.533	1	1	1	2	2	2	2	2	2	2	2	2	1	1	1	1	1	1	2	2	2	2017-07-23	57.69	2	1	2020-07-19	1092	2	1	T11
P000348444	韩金英	2	51	4	2	19.1111	1	1	1	1	1	2	2	1	1	1	2	1	1	1	1	1	1	1	2	1	2	2017-07-23	99.465	1	0	2020-07-19	1092	1	0	T
P000348445	张卫东	1	56	4	2	25.0593	1	1	1	2	2	2	2	1	1	1	1	1	1	1	1	2	1	1	#NULL!	#NULL!	#NULL!	2017-07-23	127.91	0	0	2020-07-19	1092	1	0	TL
P000348448	姜新工	1	72	5	2	25.3515	2	2	2	2	2	2	2	2	2	2	2	2	2	2	1	1	1	1	#NULL!	#NULL!	#NULL!	2017-07-23	94.29	1	0	2020-07-19	1092	2	1	T
P000348450	岳继良	1	63	5	2	19.7531	2	2	2	2	2	2	2	2	2	2	2	2	2	2	2	1	1	1	#NULL!	#NULL!	#NULL!	2017-07-23	116.505	1	0	2020-07-19	1092	1	0	TL
P000348457	罗淑兰	2	72	5	2	21.6041	1	1	2	2	2	2	2	2	2	2	2	2	2	2	1	1	1	2	2	2	2	2017-07-23	109.94	1	0	2020-07-19	1092	1	0
P000348462	于栋	1	69	4	2	26.3905	1	2	2	2	2	2	2	2	2	1	2	1	1	2	2	2	1	1	#NULL!	#NULL!	#NULL!	2017-07-22	138.48	1	0	2020-07-19	1093	1	0
P000348463	韩毅	1	60	5	2	28.075	1	1	2	2	2	2	2	2	2	2	2	2	2	1	1	2	1	1	#NULL!	#NULL!	#NULL!	2017-07-22	128.605	0	0	2020-07-18	1092	0	0
P000348467	王洁	2	68	4	2	18.3594	1	1	2	1	1	2	1	1	1	2	1	1	1	1	1	1	1	1	2	2	2	2017-07-22	66.005	2	1	2020-11-15	1212	1	0
P000348470	刘丽丽	2	58	4	2	20.5457	1	1	2	2	2	2	2	2	2	1	2	2	1	1	2	2	1	1	2	1	2	2017-07-22	156.195	0	0	2020-07-19	1093	0	0
P000348477	王宝华	2	60	3	1	22.4913	1	1	2	1	1	2	1	2	1	1	1	1	1	1	1	1	1	1	2	2	2	2017-08-05	71.225	2	1	2020-08-01	1092	1	0	TL
P000348478	阎玉琴	2	71	3	1	21.1927	1	1	2	2	2	2	2	1	2	2	2	2	1	1	2	2	1	1	1	2	2	2017-08-05	90.49	1	0	2020-08-01	1092	1	0	TL
P000348487	宁勤夫	1	62	5	2	31.2809	3	1	2	2	2	2	2	2	2	2	2	2	2	2	1	1	1	1	#NULL!	#NULL!	#NULL!	2017-07-22	166.75	0	0	2020-07-19	1093	0	0
P000348489	吴桂江	1	66	5	2	20.7612	2	2	2	2	2	2	2	2	2	2	2	2	2	2	1	1	2	1	#NULL!	#NULL!	#NULL!	2017-07-22	112.435	1	0	2020-07-19	1093	1	0
P000348490	王克刚	1	65	4	2	27.6817	3	2	2	2	2	2	2	2	2	2	2	2	2	1	2	2	1	1	#NULL!	#NULL!	#NULL!	2017-07-22	86.465	1	0	2020-11-15	1212	1	0	T
P000348494	孙乃芹	2	69	3	1	28.0102	1	1	1	2	1	1	2	1	1	1	1	2	2	1	1	1	1	1	2	2	2	2017-07-22	49.015	2	1	2020-07-19	1093	2	1	T8
P000348495	陈万云	2	60	4	2	21.2183	1	1	2	2	2	2	2	2	2	2	2	2	2	2	1	2	2	1	1	2	2	2017-07-22	78.74	2	1	2020-07-18	1092	2	1
P000348497	曹广银	1	72	5	2	22.0932	1	2	2	2	2	2	2	2	1	1	2	1	1	1	2	2	2	1	#NULL!	#NULL!	#NULL!	2017-07-22	110.15	1	0	2020-07-18	1092	0	0
P000348498	杜萍	2	45	2	1	20.5499	1	1	2	2	2	2	2	2	2	2	2	2	2	2	1	2	2	1	2	2	1	2017-08-12	173.275	0	0	2020-07-18	1071	0	0
P000348505	回金茹	2	57	2	1	23.8751	1	1	1	2	2	2	2	2	2	2	2	2	2	2	1	2	1	1	2	1	2	2017-07-29	92.9	1	0	2020-07-25	1092	0	0
P000348516	王建敏	1	59	4	2	29.8255	3	2	2	2	2	2	2	2	2	2	2	2	2	2	2	1	1	1	#NULL!	#NULL!	#NULL!	2017-07-22	108.36	1	0	2020-07-19	1093	1	0
P000348523	高岩	2	44	4	2	33.0579	1	1	1	2	1	1	1	1	1	2	1	1	1	2	2	1	1	1	2	2	1	2017-07-22	187.745	0	0	2020-07-18	1092	0	0
P000348526	朱云凤	2	58	3	1	24.7676	1	1	1	2	2	2	2	2	2	2	2	2	2	2	1	2	2	1	2	1	2	2017-07-22	97.49	1	0	2020-07-19	1093	1	0
P000348534	张纯山	1	63	3	1	25.763	1	2	1	1	1	2	2	1	1	1	1	1	1	1	1	1	1	1	#NULL!	#NULL!	#NULL!	2017-07-22	79.845	2	1	2020-07-19	1093	2	1	T10-11
P000348535	邓宝林	1	64	3	1	24.7721	2	1	2	2	2	2	1	2	1	1	1	1	2	1	2	1	1	1	#NULL!	#NULL!	#NULL!	2017-07-22	87.53	1	0	2020-07-18	1092	1	0
P000348537	王兰英	2	63	4	2	23.5078	1	1	2	2	2	2	2	2	2	2	2	2	2	2	2	2	2	1	1	2	2	2017-07-22	88.485	1	0	2020-07-19	1093	1	0
P000348541	张希才	1	68	2	1	22.4913	3	1	2	2	2	2	2	2	1	2	2	1	1	1	1	1	1	1	#NULL!	#NULL!	#NULL!	2017-07-23	91.835	1	0	2020-11-15	1211	0	0
P000348543	陈奕	1	62	5	2	22.4367	2	1	2	2	1	2	1	1	1	2	1	2	1	1	1	1	1	1	#NULL!	#NULL!	#NULL!	2017-07-23	82.33	1	0	2020-07-25	1098	1	0
P000348547	马淑萍	2	63	3	1	24.2188	1	1	1	2	1	2	2	2	2	2	2	2	2	2	2	1	1	1	2	1	2	2017-08-12	107.435	1	0	2020-08-02	1086	0	0
P000348550	刘公源	1	67	5	2	25.6612	3	2	2	2	2	2	2	2	2	1	2	1	1	1	2	1	1	1	#NULL!	#NULL!	#NULL!	2017-07-23	92.845	1	0	2020-07-19	1092	1	0
P000348551	任力	1	62	5	2	22.3863	1	1	1	2	2	2	2	2	1	1	2	1	2	1	2	2	1	1	#NULL!	#NULL!	#NULL!	2017-07-23	110.555	1	0	2020-07-19	1092	1	0
P000348554	李维和	1	57	5	2	24.1115	2	1	2	2	2	2	2	1	1	2	1	1	1	1	2	1	1	1	#NULL!	#NULL!	#NULL!	2017-07-23	112.705	1	0	2020-07-19	1092	0	0
P000348556	王杰	1	63	5	2	23.3887	2	1	2	2	2	2	2	2	1	1	1	1	2	1	1	2	1	1	#NULL!	#NULL!	#NULL!	2017-07-23	81.07	1	0	2020-07-19	1092	1	0
P000348557	王俊华	2	64	5	2	26.3465	1	1	1	2	2	2	2	2	2	2	2	2	2	2	1	1	1	1	2	2	2	2017-07-23	115.325	1	0	2020-07-19	1092	1	0
P000348559	王凤英	2	55	3	1	34.5168	1	1	2	2	2	2	2	2	2	2	2	2	2	2	1	1	1	1	2	2	2	2017-07-23	82.58	1	0	2020-07-25	1098	1	0
P000348561	周景荣	2	70	2	1	28.0404	1	1	2	2	2	2	1	1	1	1	1	1	1	1	2	1	1	1	2	2	2	2017-07-23	88.395	1	0	2020-07-25	1098	1	0
P000348580	王荣君	2	62	4	2	26.8136	1	1	1	2	2	2	2	2	2	2	2	1	1	1	1	1	1	1	2	2	2	2017-07-22	77.68	2	1	2020-07-19	1093	1	0
P000349543	尹冰	2	57	3	1	25.0399	1	1	1	2	2	2	2	2	2	2	2	2	2	2	1	1	2	1	2	2	2	2017-07-29	91.485	1	0	2020-07-25	1092	1	0
P000349547	刘津生	1	58	5	2	20.4152	2	1	2	2	2	2	2	2	2	2	2	2	2	2	1	1	1	1	#NULL!	#NULL!	#NULL!	2017-07-29	66.925	2	1	2020-07-25	1092	1	0	TL
P000349552	马颖	2	54	5	2	22.0386	1	1	1	2	2	2	1	1	1	1	1	1	1	1	1	1	1	1	2	1	1	2017-07-29	129.19	0	0	2020-07-25	1092	0	0
P000349554	郭立顺	1	44	5	2	23.04	1	1	1	1	2	1	1	1	1	1	1	1	1	1	1	1	1	1	#NULL!	#NULL!	#NULL!	2017-07-29	118.435	1	0	2020-07-25	1092	2	1	T9-10
P000349556	魏文友	1	70	2	1	21.9713	2	1	2	2	2	2	2	2	2	2	2	2	1	1	1	1	1	1	#NULL!	#NULL!	#NULL!	2017-07-29	93.17	1	0	2020-08-01	1099	1	0	TL
P000349560	刘军	2	65	3	1	21.3333	1	1	2	2	2	2	2	2	2	2	2	2	1	1	1	1	2	1	2	2	2	2017-07-29	72.17	2	1	2020-08-01	1099	1	0	TL
P000349578	靳宝菊	2	60	3	1	27.8293	2	1	1	2	2	2	2	2	1	2	2	2	2	2	1	1	1	1	2	2	2	2017-07-29	85.865	1	0	2020-07-25	1092	1	0	L
P000349581	刘树成	1	72	5	2	26.2596	3	2	2	2	2	2	2	2	1	1	2	2	1	1	2	1	1	1	#NULL!	#NULL!	#NULL!	2017-07-29	87.68	1	0	2020-08-02	1100	0	0
P000349584	张庆祥	1	61	3	1	35.1751	2	1	2	2	2	2	2	2	2	2	2	2	2	2	1	1	1	1	#NULL!	#NULL!	#NULL!	2017-07-29	58.715	2	1	2020-07-25	1092	2	1	T11
P000349586	史连起	1	58	3	1	25.8264	3	2	2	2	2	2	2	2	2	2	2	2	2	2	1	1	1	1	#NULL!	#NULL!	#NULL!	2017-07-29	112.04	1	0	2020-07-25	1092	0	0
P000349587	闫春香	2	60	4	2	26.2188	1	1	2	2	2	2	2	2	2	2	2	2	2	2	1	2	2	1	2	2	2	2017-07-29	70.89	2	1	2020-07-25	1092	1	0	TL
P000349591	张凤云	2	61	3	1	26.4463	1	1	2	2	2	2	2	1	1	1	1	1	1	1	1	1	1	1	2	1	2	2017-07-29	104.465	1	0	2020-07-25	1092	1	0
P000349593	蔺金城	1	61	4	2	22.0932	2	2	2	2	2	2	2	2	2	2	2	2	2	2	1	1	1	1	#NULL!	#NULL!	#NULL!	2017-07-29	87.24	1	0	2020-07-25	1092	2	1
P000349604	刘学琨	1	68	3	1	22.3081	1	1	2	1	1	2	2	2	2	2	2	2	2	2	1	1	1	1	#NULL!	#NULL!	#NULL!	2017-07-29	51.16	2	1	2020-11-15	1205	2	1	L1-2
P000349605	李玉梅	2	53	4	2	24.2439	1	1	2	2	2	2	2	2	2	2	2	2	2	2	1	1	2	1	2	1	2	2017-07-29	95.985	1	0	2020-07-25	1092	1	0
P000349627	杨志茹	2	66	3	1	29.7619	3	2	2	2	2	2	2	2	1	1	2	2	1	1	2	1	1	1	2	2	1	2017-07-30	111.235	1	0	2020-07-25	1091	1	0
P000349628	杨志敬	2	53	3	1	22.3081	1	1	2	2	2	2	2	2	2	2	2	2	2	2	1	1	1	2	2	2	2	2017-07-30	118.995	1	0	2020-07-25	1091	1	0
P000349633	杨瑞霞	2	46	4	2	21.6413	1	1	1	2	1	2	2	1	1	1	1	1	1	1	1	1	1	1	2	1	1	2017-07-30	83.075	1	0	2020-08-01	1098	1	0	TL
P000349634	庞连洪	1	55	4	2	21.4844	1	1	2	2	2	2	2	2	2	2	2	2	1	1	1	1	1	1	#NULL!	#NULL!	#NULL!	2017-07-30	119.885	1	0	2020-08-01	1098	1	0	L
P000349661	高美岭	1	73	5	2	24.4898	2	2	1	2	2	2	2	2	1	1	2	2	1	1	2	1	1	1	#NULL!	#NULL!	#NULL!	2017-07-30	72.715	2	1	2020-07-25	1091	1	0
P000349663	曹保宝	2	57	4	2	24.974	1	1	2	2	2	2	2	2	1	2	2	1	1	1	2	2	1	1	2	2	2	2017-07-30	77.52	2	1	2020-11-15	1204	1	0
P000349665	党宝津	1	63	5	2	23.7954	2	2	2	2	2	2	2	2	2	2	2	2	2	2	1	1	1	1	#NULL!	#NULL!	#NULL!	2017-07-30	70.56	2	1	2020-07-25	1091	1	0
P000349666	白金娥	2	62	5	2	19.1512	1	1	2	2	2	2	2	2	2	2	2	2	2	2	1	2	1	1	2	1	2	2017-07-30	55.84	2	1	2020-11-15	1204	2	1	T9
P000349667	王菊花	2	56	4	2	21.2585	1	1	2	2	2	2	2	2	1	2	2	2	2	2	1	1	1	1	2	2	2	2017-07-29	120.73	0	0	2020-07-26	1093	0	0
P000349677	程琪	1	62	4	2	26.2976	3	1	1	2	2	2	2	1	1	1	1	1	1	1	1	1	1	1	#NULL!	#NULL!	#NULL!	2017-07-29	112.155	1	0	2020-07-25	1092	1	0	L1-2,L2骨质增生
P000349678	吴建军	1	47	4	2	27.3356	3	1	2	2	2	2	2	2	1	2	2	1	2	2	2	2	1	1	#NULL!	#NULL!	#NULL!	2017-08-05	144.92	0	0	2020-08-01	1092	0	0
P000349680	邢继民	1	60	5	2	27.6817	3	1	2	2	2	2	2	2	2	2	2	1	1	1	2	1	1	1	#NULL!	#NULL!	#NULL!	2017-07-29	53.735	2	1	2020-07-25	1092	2	1	L2
P000349689	王连柱	1	64	5	2	23.2434	2	2	1	2	2	2	1	1	1	1	1	1	1	1	1	2	1	1	#NULL!	#NULL!	#NULL!	2017-07-29	45.055	2	1	2020-08-01	1099	2	1	TL
P000349694	荣建华	2	66	3	1	22.5827	1	1	2	1	1	2	2	1	1	1	2	1	2	1	1	2	1	1	2	2	2	2017-07-29	76.68	2	1	2020-08-02	1100	1	0	TL
P000349704	李德生	1	62	3	1	22.5981	2	1	2	2	2	2	2	2	1	1	2	1	1	1	2	1	2	1	#NULL!	#NULL!	#NULL!	2017-07-29	130.715	0	0	2020-07-25	1092	0	0
P000349705	李正华	2	61	4	2	26.6299	1	1	1	2	2	2	2	2	2	1	2	1	2	1	2	2	2	1	2	2	2	2017-07-29	102.47	1	0	2020-07-25	1092	1	0
P000349706	李欣惠	1	57	5	2	27.7551	3	1	2	1	1	2	2	2	1	1	1	1	1	1	2	2	1	1	#NULL!	#NULL!	#NULL!	2017-07-29	77.985	2	1	2020-07-25	1092	1	0
P000349713	冯国娟	2	51	3	1	24.0346	1	1	1	2	2	2	2	1	1	1	1	1	2	1	1	1	1	2	2	2	2	2017-07-29	151.01	0	0	2020-07-25	1092	0	0
P000349719	彭玉芬	2	56	5	2	21.4844	1	1	2	2	2	2	2	2	2	2	2	2	2	2	2	2	2	1	2	2	2	2017-07-29	68.375	2	1	2020-07-25	1092	1	0	T11
P000349723	张敬凤	2	53	4	2	23.4375	1	1	2	2	2	2	2	2	2	2	2	2	2	2	1	1	1	1	2	2	2	2017-07-29	114.15	1	0	2020-07-25	1092	1	0	L
P000349730	郑伟刚	1	59	4	2	23.9395	2	1	2	2	2	2	1	2	2	2	1	1	1	1	2	2	1	2	#NULL!	#NULL!	#NULL!	2017-07-29	58.66	2	1	2020-07-25	1092	3	1	T12,L2-2
P000349736	周连军	1	44	2	1	23.3067	3	1	1	2	2	2	2	1	1	1	1	1	1	1	1	1	1	1	#NULL!	#NULL!	#NULL!	2017-07-29	147.235	0	0	2020-07-25	1092	0	0
P000349737	胡月英	2	47	2	1	22.3081	1	1	1	1	1	2	1	1	2	1	1	1	1	1	1	1	1	1	2	2	1	2017-07-29	139.35	0	0	2020-07-25	1092	1	0
p000349738	李振全	1	57	5	2	29.6495	3	1	2	2	2	2	2	2	2	2	2	2	2	2	1	2	2	1	#NULL!	#NULL!	#NULL!	2017-07-30	107.035	1	0	2020-07-25	1091	1	0	TL
P000349742	胡志敏	2	59	5	2	17.782	1	1	2	2	2	2	2	2	2	2	2	2	2	2	1	1	2	1	2	2	2	2017-07-30	153.05	0	0	2020-07-25	1091	0	0
P000349748	张连坤	1	72	5	2	31.9193	3	1	2	2	1	2	2	2	1	1	2	1	1	1	1	1	1	1	#NULL!	#NULL!	#NULL!	2017-07-15	55.71	2	1	2020-11-15	1219	1	0
P000349749	肖国威	1	62	5	2	24.7405	3	1	2	2	2	2	2	2	1	1	1	1	1	1	2	1	2	1	#NULL!	#NULL!	#NULL!	2017-07-29	121.875	0	0	2020-07-25	1092	0	0
P000349754	刘爱恒	2	64	5	2	27.9421	1	1	2	2	2	2	2	2	2	2	2	2	2	1	2	1	1	1	2	1	2	2017-07-30	134.905	0	0	2020-07-25	1091	0	0
P000349755	宋宏良	1	72	5	2	28.0102	3	1	2	2	2	2	2	2	2	2	2	1	1	1	2	2	1	1	#NULL!	#NULL!	#NULL!	2017-07-30	103.79	1	0	2020-07-25	1091	1	0	L2-3严重骨质增生及终板炎
P000349759	李淑利	2	72	5	2	24.6548	1	1	2	2	2	2	2	2	2	2	2	2	2	2	1	2	1	1	2	2	2	2017-07-30	67.055	2	1	2020-07-25	1091	1	0
P000349769	缪哲明	1	62	5	2	23.6713	2	1	2	2	2	2	2	2	2	2	2	2	2	2	2	1	1	1	#NULL!	#NULL!	#NULL!	2017-07-30	73.72	2	1	2020-07-25	1091	1	0
P000349814	郝晓堂	2	42	3	1	25.6874	1	1	1	2	2	2	2	2	2	2	2	2	2	2	1	1	1	1	2	2	1	2017-07-29	154.135	0	0	2020-08-01	1099	1	0	T12-L1
P000350799	张选伟	2	69	4	2	19.5312	1	1	2	2	2	2	2	2	2	2	2	2	2	2	2	2	1	1	2	2	2	2017-08-05	69.105	2	1	2020-08-01	1092	1	0	L
P000350801	张玉华	2	58	4	2	29.1363	1	1	2	2	2	2	2	1	2	2	2	2	2	2	2	2	2	1	2	1	2	2017-08-05	83.315	1	0	2020-08-01	1092	1	0	T
P000350808	门焕然	2	70	4	2	24.2215	1	1	2	2	2	2	2	2	2	2	2	2	2	2	1	1	2	1	2	2	2	2017-08-05	41.62	2	1	2020-07-25	1085	1	0
P000350813	许迎生	1	54	4	2	19.1516	2	1	2	2	2	2	2	2	1	2	2	2	2	2	1	1	1	1	#NULL!	#NULL!	#NULL!	2017-08-05	78.34	2	1	2020-08-02	1093	1	0	T 陈旧
P000350814	周建荣	1	65	5	2	24.2215	2	1	1	2	2	2	2	2	2	2	2	2	2	2	1	2	1	1	#NULL!	#NULL!	#NULL!	2017-08-05	98.14	1	0	2020-08-01	1092	1	0	TL
P000350818	王志和	1	59	5	2	25.8806	1	2	2	1	1	2	2	2	2	1	1	1	2	1	1	1	1	1	#NULL!	#NULL!	#NULL!	2017-08-05	48.65	2	1	2020-08-01	1092	1	0	L
P000350821	齐立志	1	55	4	2	21.7993	2	2	2	2	1	2	2	2	1	1	1	1	2	1	2	1	1	1	#NULL!	#NULL!	#NULL!	2017-08-05	139.285	0	0	2020-07-25	1085	1	0
P000350822	王桂玲	2	72	3	1	22.8624	1	1	2	2	2	2	2	1	1	1	1	1	1	1	1	2	2	1	2	2	2	2017-08-05	112.8	1	0	2020-08-01	1092	1	0	T12
P000350824	刘福财	1	59	4	2	25.9516	2	2	2	2	2	2	2	2	2	2	2	2	2	2	2	1	1	2	#NULL!	#NULL!	#NULL!	2017-08-05	66.25	2	1	2020-11-15	1198	3	1	L1
P000350846	严马	1	62	5	2	25.1808	1	1	2	2	2	2	2	1	2	1	1	1	2	1	1	2	1	1	#NULL!	#NULL!	#NULL!	2017-08-05	116.19	1	0	2020-08-01	1092	0	0
P000350858	王爱民	2	59	4	2	26.0375	1	1	2	2	2	2	2	2	2	2	2	2	2	2	2	2	2	1	2	2	2	2017-08-06	106.475	1	0	2020-08-01	1091	1	0	T
P000350863	王建国	1	48	4	2	29.4118	1	1	1	2	1	2	2	1	2	1	1	1	1	1	1	1	1	1	#NULL!	#NULL!	#NULL!	2017-08-06	129.295	0	0	2020-08-01	1091	1	0	T
P000350869	马晋华	1	66	3	1	22.7583	2	2	2	1	2	2	1	1	1	1	1	1	1	2	2	1	1	1	#NULL!	#NULL!	#NULL!	2017-08-06	141.765	0	0	2020-08-01	1091	0	0
P000350871	俞世华	1	71	5	2	24.3046	3	1	2	2	2	2	1	2	1	1	2	1	1	1	2	1	1	1	#NULL!	#NULL!	#NULL!	2017-08-06	155.78	0	0	2020-08-01	1091	0	0
P000350873	马艳萍	2	55	2	1	24.4141	1	1	1	2	2	2	2	2	1	1	2	1	1	2	2	1	1	1	2	2	2	2017-08-06	118.83	1	0	2020-08-02	1092	0	0
P000350874	尹小娟	2	68	3	1	25.3906	1	1	2	2	2	2	2	2	2	2	2	2	2	2	1	2	2	1	2	2	2	2017-08-06	58.88	2	1	2020-08-01	1091	1	0	TL
P000350876	冯振英	1	58	3	1	26.7299	2	1	1	2	1	2	2	2	1	2	2	2	2	1	2	2	1	1	#NULL!	#NULL!	#NULL!	2017-08-06	126.65	0	0	2020-08-22	1112	0	0
P000350879	杨秀梅	2	59	4	2	16.263	1	1	1	2	1	2	1	2	1	1	1	2	1	1	1	1	1	1	2	1	2	2017-08-06	82.455	1	0	2020-08-22	1112	1	0	T
P000350881	魏建平	1	53	4	2	23.084	2	1	1	2	2	2	2	2	1	1	1	1	1	1	1	2	1	1	#NULL!	#NULL!	#NULL!	2017-08-06	146.935	0	0	2020-08-02	1092	0	0
P000350884	曹积玉	2	62	4	2	24.9108	1	1	2	2	2	2	2	2	2	1	2	1	1	1	1	2	2	1	2	2	2	2017-08-12	83.06	1	0	2020-11-14	1190	1	0
P000350885	刘国成	1	57	4	2	28.5627	2	1	2	2	2	2	2	2	1	1	2	2	2	1	1	1	1	1	#NULL!	#NULL!	#NULL!	2017-08-06	85.685	1	0	2020-08-01	1091	1	0	L1
P000350889	崔兰	2	49	5	2	19.8141	1	1	1	2	2	2	2	2	2	2	2	2	2	2	1	1	1	1	2	2	2	2017-08-06	114.195	1	0	2020-08-01	1091	1	0	TL
P000350890	杨金钢	1	63	4	2	21.9774	2	1	2	2	2	2	2	2	1	2	2	2	1	1	2	1	1	1	#NULL!	#NULL!	#NULL!	2017-08-06	97.965	1	0	2020-08-01	1091	1	0	L1
P000350891	马绍纯	1	73	5	2	24.8016	1	1	2	1	2	2	2	2	1	2	2	1	2	1	2	1	1	1	#NULL!	#NULL!	#NULL!	2017-08-06	65.26	2	1	2020-08-02	1092	1	0	T 陈旧
P000350892	宋洁钢	1	52	5	2	30.2469	2	1	1	2	2	2	2	1	1	1	1	1	1	2	2	1	1	1	#NULL!	#NULL!	#NULL!	2017-08-06	97.135	1	0	2020-08-01	1091	1	0	T
P000350895	彭国敏	2	54	4	2	24.7676	1	1	2	2	2	2	2	2	1	2	2	2	1	1	1	1	1	1	2	2	2	2017-08-05	123.515	0	0	2020-07-19	1079	0	0
P000350901	钱福生	1	67	4	2	24.7676	2	1	1	1	1	2	2	1	1	1	1	1	1	1	2	1	1	1	#NULL!	#NULL!	#NULL!	2017-08-05	52.415	2	1	2020-08-01	1092	1	0	TL
P000350907	谭开忠	2	60	4	2	27.3438	1	1	2	2	2	2	2	2	2	2	2	2	2	2	1	1	1	1	2	2	2	2017-08-20	123.7	0	0	2020-08-22	1098	0	0
P000350908	田宝利	1	63	3	1	25.1808	2	1	2	2	2	2	2	2	2	2	2	2	2	2	1	1	1	1	#NULL!	#NULL!	#NULL!	2017-08-05	100.665	1	0	2020-06-21	1051	1	0
P000350916	杨立勇	1	46	3	1	29.0123	2	1	1	2	2	2	2	2	1	1	2	2	2	1	2	1	2	1	#NULL!	#NULL!	#NULL!	2017-08-05	117.655	1	0	2020-08-01	1092	2	1	L1
P000350917	王砚晖	2	45	4	2	24.4352	1	1	1	2	2	2	2	2	1	2	2	1	1	1	1	1	1	1	2	2	1	2017-08-05	173.2	0	0	2020-08-01	1092	1	0	L1
P000350926	陈祥骢	1	67	5	2	29.4076	1	1	2	2	1	2	2	2	2	2	2	2	2	2	1	1	1	1	#NULL!	#NULL!	#NULL!	2017-08-05	56.98	2	1	2020-07-25	1085	2	1	T
P000350928	齐晓燕	2	66	3	1	19.7232	1	1	2	2	2	2	2	2	2	2	2	2	2	2	1	1	1	1	2	2	2	2017-08-05	77.585	2	1	2020-07-25	1085	2	1	T11-12OP及OVCF
P000350933	孙敏	2	60	3	1	21.6441	1	1	2	2	2	2	2	2	2	2	2	2	2	1	1	1	1	1	2	2	2	2017-08-05	129	0	0	2020-08-01	1092	0	0
P000350942	吴胜华	1	51	5	2	25.9516	2	2	2	2	2	2	2	2	2	2	2	2	2	2	2	2	2	2	#NULL!	#NULL!	#NULL!	2017-08-05	113.385	1	0	2020-08-01	1092	1	0	TL
P000350956	孙栩翎	2	68	5	2	25.7812	1	1	2	2	2	2	2	2	2	2	2	2	2	2	2	1	2	1	2	2	2	2017-08-05	99.17	1	0	2020-08-01	1092	0	0
P000350958	李宏屹	1	44	5	2	21.5451	2	2	1	2	1	2	2	1	1	2	2	2	1	1	2	1	2	1	#NULL!	#NULL!	#NULL!	2017-08-05	108.8	1	0	2020-07-25	1085	0	0
P000350961	徐金玲	2	53	5	2	22.8329	1	1	2	2	2	2	2	2	2	2	2	2	2	2	1	1	1	1	2	2	2	2017-08-05	76.935	2	1	2020-08-01	1092	0	0
P000350962	徐莉	2	61	3	1	20.8117	1	1	2	2	2	2	2	2	2	2	2	2	2	2	1	1	2	1	2	2	2	2017-08-05	93.955	1	0	2020-08-01	1092	1	0	L
P000350963	汪虹	2	62	4	2	21.6041	1	1	2	2	2	2	2	1	2	2	1	1	1	1	1	2	1	1	2	2	2	2017-08-05	84.12	1	0	2020-08-01	1092	2	1	T11
P000350971	赵铁宝	1	64	3	1	26.1224	1	1	1	2	2	2	2	1	1	1	1	1	1	1	1	1	1	1	#NULL!	#NULL!	#NULL!	2017-08-05	81.57	1	0	2020-08-01	1092	2	1	T11-L1
P000350972	夏振敏	2	62	3	1	23.0518	1	1	1	2	2	2	2	2	2	2	2	2	2	2	1	1	1	1	2	2	2	2017-08-05	45.505	2	1	2020-08-01	1092	2	1	T7
P000350973	王美珍	2	53	3	1	23.0518	1	1	2	2	2	2	2	2	2	2	2	2	1	1	1	1	2	1	2	2	2	2017-08-06	72.84	2	1	2020-11-15	1197	1	0
P000350975	邱淑英	2	56	4	2	25.7117	1	1	2	2	2	2	2	2	2	2	2	2	2	2	1	1	1	2	2	2	2	2017-08-06	126.03	0	0	2020-08-01	1091	0	0
P000350976	魏同禄	1	67	3	1	24.2215	2	1	2	2	2	2	2	2	2	2	2	2	2	2	1	1	1	1	#NULL!	#NULL!	#NULL!	2017-08-06	63.19	2	1	2020-08-02	1092	2	1	T11 新发
P000350977	李汝兰	2	68	3	1	23.8751	1	1	2	2	2	2	2	2	2	2	2	2	2	2	1	1	1	1	2	2	2	2017-08-06	68.52	2	1	2020-08-02	1092	1	0	L2
P000350980	吉桂茹	2	53	4	2	19.3359	1	1	1	2	2	2	2	2	2	2	2	2	2	2	1	1	1	1	2	2	2	2017-08-06	135.895	0	0	2020-08-01	1091	0	0
P000350982	孙洪水	2	54	4	2	22.2656	1	1	1	2	2	2	2	2	2	2	2	2	2	2	1	2	2	1	2	2	2	2017-08-06	103.765	1	0	2020-08-01	1091	1	0	T
P000351048	沈金芳	2	63	4	2	19.8141	1	1	2	2	2	2	2	2	1	2	2	2	2	2	1	2	1	1	2	1	2	2017-08-05	86.775	1	0	2020-08-01	1092	1	0	T
P000351057	赵桂珍	2	61	3	1	22.6003	1	1	2	2	2	2	2	2	2	2	2	2	2	2	1	1	1	1	2	1	2	2017-08-05	114.945	1	0	2020-08-01	1092	1	0	T11
P000351062	张宏森	1	68	5	2	24.1588	3	1	2	2	2	2	2	2	2	2	2	2	2	2	2	1	1	1	#NULL!	#NULL!	#NULL!	2017-08-05	128.01	0	0	2020-08-01	1092	1	0	TL
P000351067	赵淑荣	2	64	3	1	23.2377	1	1	2	2	2	2	2	1	2	1	1	1	1	1	2	1	1	1	1	2	2	2017-08-06	63.61	2	1	2020-08-01	1091	1	0	L1
P000351072	尹文义	1	70	5	2	24.6181	1	1	1	2	2	2	2	2	2	2	2	2	2	2	1	1	1	1	#NULL!	#NULL!	#NULL!	2017-08-06	88.06	1	0	2020-08-01	1091	1	0	TL
P000351074	郭文英	2	66	3	1	27.6888	1	1	1	2	2	2	2	2	2	2	2	2	2	2	2	1	1	1	2	2	2	2017-08-06	80.58	1	0	2020-08-01	1091	2	1	T
P000352024	李春和	1	66	4	2	24.4898	2	2	2	2	1	2	2	2	1	1	1	1	1	1	2	1	1	1	#NULL!	#NULL!	#NULL!	2017-08-12	71.315	2	1	2020-08-02	1086	1	0	T 陈旧
P000352027	王志刚	1	71	4	2	22.6757	1	1	1	2	2	2	2	2	2	2	2	2	2	2	2	1	1	1	#NULL!	#NULL!	#NULL!	2017-08-12	95.36	1	0	2020-08-02	1086	1	0	T 陈旧
P000352036	孙淑清	2	70	5	2	25.5588	1	1	2	2	2	2	2	2	2	2	2	1	1	1	1	1	1	1	2	2	2	2017-08-12	31.55	2	1	2020-08-02	1086	2	1	TL 陈旧
P000352043	张肖峰	1	56	5	2	29.4118	2	1	2	2	2	2	2	2	2	2	2	2	2	2	2	1	1	1	#NULL!	#NULL!	#NULL!	2017-08-12	103.86	1	0	2020-11-15	1191	0	0
P000352046	王恩秀	2	63	4	2	23.5883	1	1	1	2	2	2	2	2	2	2	2	2	2	2	1	1	1	1	2	2	2	2017-08-12	87.505	1	0	2020-08-02	1086	0	0
P000352050	张惠仙	2	63	5	2	23.7118	1	1	1	2	2	2	2	2	2	2	2	2	2	1	1	1	1	1	2	1	2	2017-08-12	58.845	2	1	2020-08-02	1086	1	0	T 陈旧
P000352051	孙东兴	1	69	5	2	27.6817	1	2	2	2	2	2	2	2	2	2	2	2	2	1	1	1	1	1	#NULL!	#NULL!	#NULL!	2017-08-12	94.68	1	0	2020-08-02	1086	1	0	T 新发
P000352056	邓桂芳	2	64	3	1	26.2917	1	1	2	2	2	2	2	2	2	2	2	2	2	2	1	2	1	1	2	2	2	2017-08-12	85.8	1	0	2020-08-01	1085	1	0	L
P000352057	赵连发	1	65	3	1	20.148	2	1	1	2	2	2	2	2	2	2	2	2	2	2	2	1	1	1	#NULL!	#NULL!	#NULL!	2017-08-12	63.26	2	1	2020-08-22	1106	2	1	T12
P000352059	王朴	1	66	5	2	25.6896	2	1	2	2	2	2	2	2	2	2	2	2	2	2	2	1	1	1	#NULL!	#NULL!	#NULL!	2017-08-22	115.515	1	0	2020-08-22	1096	0	0
P000352060	周雅玲	2	54	3	1	26.4381	1	1	2	2	2	2	2	2	2	2	2	2	2	2	2	1	1	1	2	2	2	2017-08-12	69.765	2	1	2020-08-22	1106	1	0	T
P000352066	杨成坤	2	63	3	1	24.5578	1	1	1	2	2	2	2	2	2	2	2	2	2	2	1	1	1	1	2	1	2	2017-08-12	78.865	2	1	2020-08-02	1086	1	0	T 陈旧
P000352068	阎淑珍	2	68	3	1	20.3125	1	1	2	2	2	2	2	2	2	2	2	2	2	1	1	1	1	1	2	2	2	2017-08-05	131.06	0	0	2020-08-22	1113	0	0
P000352092	顾明	2	63	3	1	22.68	1	1	2	2	2	2	2	2	2	2	2	2	2	2	2	2	2	1	2	2	2	2017-08-12	88.585	1	0	2020-08-01	1085	1	0	T
P000352093	王玮	1	50	5	2	25.8806	3	1	1	2	2	2	2	2	2	2	2	2	2	2	2	1	2	1	#NULL!	#NULL!	#NULL!	2017-08-12	162.285	0	0	2020-08-01	1085	0	0
P000352097	马建军	1	52	4	2	23.6713	2	1	1	1	2	1	2	2	1	2	2	1	1	1	2	1	1	1	#NULL!	#NULL!	#NULL!	2017-08-12	106.04	1	0	2020-08-02	1086	0	0
P000352099	贾涛	1	46	4	2	30.3233	3	1	1	2	2	2	2	2	1	2	1	1	2	1	1	2	1	1	#NULL!	#NULL!	#NULL!	2017-08-12	130.685	0	0	2020-08-02	1086	1	0	TL
P000352107	芦学勤	1	60	4	2	28.3737	3	2	2	2	2	2	1	2	1	2	1	1	1	1	1	1	1	1	#NULL!	#NULL!	#NULL!	2017-08-12	125.655	0	0	2020-11-15	1191	2	1	L1
P000352113	杨淑英	2	62	3	1	27.1809	1	1	2	2	2	2	2	2	2	2	2	2	2	2	2	2	2	1	2	2	2	2017-08-12	77.44	2	1	2020-08-01	1085	1	0	TL
P000352115	王志伟	1	59	4	2	25.6055	2	1	1	2	2	2	1	2	1	1	1	1	2	2	1	1	1	1	#NULL!	#NULL!	#NULL!	2017-08-12	72.19	2	1	2020-11-15	1191	1	0	L
P000352118	张桂芬	2	58	3	1	20.0288	1	1	2	2	2	2	2	2	2	2	2	1	1	1	1	2	2	1	2	2	2	2017-08-12	117.87	1	0	2020-11-15	1191	1	0
P000352120	孙继武	1	65	3	1	30.1162	3	2	2	2	2	2	2	2	1	2	1	1	2	2	2	1	1	1	#NULL!	#NULL!	#NULL!	2017-08-12	72.58	2	1	2020-08-02	1086	3	1	T12陈旧
P000352121	何林	1	56	4	2	22.571	2	1	2	2	2	1	1	1	1	1	1	1	1	1	2	1	1	1	#NULL!	#NULL!	#NULL!	2017-08-12	101.225	1	0	2020-08-02	1086	1	0	TL
P000352142	高润芳	2	57	3	1	25.9701	1	1	1	2	2	2	2	1	1	1	1	1	1	1	1	1	1	1	2	2	2	2017-09-16	65.42	2	1	2020-12-06	1177	1	0	T
P000352214	杨富荣	2	62	4	2	29.3848	1	1	2	2	2	2	2	2	2	2	2	2	2	2	1	1	1	1	2	1	2	2017-08-12	74.965	2	1	2020-08-02	1086	1	0	T
P000352219	佟立红	2	61	4	2	22.0604	1	1	2	2	2	2	1	2	2	2	2	2	2	2	1	1	1	1	2	2	2	2017-08-12	91.98	1	0	2020-08-02	1086	1	0	T
P000353151	赵丕山	1	61	4	2	22.8571	2	1	2	2	2	2	2	2	2	2	2	2	2	2	1	1	1	1	#NULL!	#NULL!	#NULL!	2017-08-19	70.665	2	1	2020-08-08	1085	2	1	TL 陈旧
P000353179	张月梅	2	63	5	2	26.398	1	1	2	2	2	2	2	2	2	2	2	2	2	2	1	1	1	1	2	2	2	2017-08-19	111.1	1	0	2020-08-22	1099	0	0
P000353183	张和平	1	66	4	2	27.7177	3	2	2	2	2	2	2	2	2	2	2	2	2	2	2	2	2	2	#NULL!	#NULL!	#NULL!	2017-08-19	75.4	2	1	2020-08-22	1099	0	0
P000353199	张敏华	2	65	4	2	20.5499	1	1	2	2	2	2	2	2	2	2	2	2	2	2	1	1	1	1	2	2	2	2017-08-19	91.745	1	0	2020-08-22	1099	0	0
P000353218	杨建春	2	61	4	2	24.2188	1	1	2	2	1	2	2	1	2	1	2	1	2	1	1	2	1	1	2	1	2	2017-08-20	110.52	1	0	2020-08-22	1098	0	0
P000353219	张全利	1	64	5	2	24.3141	1	1	2	1	1	2	2	2	1	1	1	1	1	1	2	1	1	1	#NULL!	#NULL!	#NULL!	2017-08-20	91.78	1	0	2020-08-22	1098	0	0
P000353226	陈文兰	2	65	5	2	22.4813	1	1	1	2	2	2	2	2	2	2	2	2	2	2	1	2	1	1	2	2	2	2017-08-20	53.37	2	1	2020-08-22	1098	1	0	T
P000353227	孟昭庆	1	65	5	2	22.921	1	1	1	2	2	2	2	2	2	2	2	2	2	2	1	1	2	1	#NULL!	#NULL!	#NULL!	2017-08-20	96.75	1	0	2020-08-22	1098	0	0
P000353228	李玉翠	2	53	4	2	23.3355	1	1	1	2	2	2	2	2	2	2	2	2	2	2	1	1	1	1	2	2	2	2017-08-20	121.745	0	0	2020-08-22	1098	0	0
P000353230	徐金玲	2	52	1	1	20	2	1	1	2	2	2	2	2	2	2	2	2	2	2	1	2	1	1	1	#NULL!	2	2017-08-20	103.31	1	0	2020-08-22	1098	1	0	TL
P000353233	张秀玲	2	57	4	2	21.4844	1	1	1	2	2	2	2	2	2	2	2	2	2	2	1	1	2	1	2	2	2	2017-08-20	147.45	0	0	2020-08-22	1098	0	0
P000353268	郝红旗	1	59	4	2	21.847	1	1	2	2	2	2	2	2	2	2	2	2	2	2	1	1	1	1	#NULL!	#NULL!	#NULL!	2017-08-19	106.045	1	0	2020-09-06	1114	1	0	L
P000353275	阴济华	2	70	4	2	24.0346	1	1	1	2	2	2	2	2	2	2	2	2	2	2	1	1	1	1	2	2	2	2017-08-19	57.5	2	1	2020-08-22	1099	1	0
P000353276	姜进	1	58	5	2	24.2215	2	1	1	1	2	1	1	1	1	1	1	1	1	1	2	1	1	1	#NULL!	#NULL!	#NULL!	2017-08-26	31.935	2	1	2020-08-22	1092	1	0
P000353307	郑颖	2	43	5	2	18.369	1	1	1	2	1	2	2	2	2	1	1	2	1	2	1	2	1	1	1	#NULL!	1	2017-08-26	200.19	0	0	2020-08-22	1092	0	0
P000353308	李岚亭	2	52	4	2	22.4103	1	1	2	2	2	2	2	1	1	1	2	1	1	1	2	1	2	1	2	1	2	2017-08-19	112.24	1	0	2020-11-15	1184	0	0
P000353309	刘钢	1	51	4	2	26.8274	3	1	1	2	1	2	2	2	1	1	1	1	1	1	2	2	1	1	#NULL!	#NULL!	#NULL!	2017-08-19	123.09	0	0	2020-11-15	1184	0	0
P000353333	张玉芬	2	60	3	1	20.5457	1	1	1	2	2	2	2	2	2	1	2	2	1	2	1	2	1	1	2	2	2	2017-08-19	112.305	1	0	2020-08-22	1099	0	0
P000353334	张玉珍	2	58	3	1	23.4375	1	1	1	2	1	2	2	2	2	1	1	2	1	2	1	1	1	1	2	1	2	2017-08-19	85.58	1	0	2020-08-22	1099	0	0
P000353337	王静	2	54	4	2	22.6003	1	1	1	1	1	1	2	1	2	1	1	1	1	1	2	1	1	2	2	2	2	2017-08-20	63.405	2	1	2020-09-22	1129	0	0
P000353342	王秀春	2	66	3	1	28.1337	1	1	1	1	2	2	1	2	1	1	1	1	1	1	1	2	2	1	2	2	2	2017-08-20	122.705	0	0	2020-08-22	1098	1	0	L
P000353343	邸援生	1	65	3	1	24.2215	2	1	2	2	2	2	2	1	1	1	1	1	1	1	1	1	1	1	#NULL!	#NULL!	#NULL!	2017-08-20	83	1	0	2020-08-22	1098	1	0	T12-L1
P000353344	王令强	2	66	4	2	23.8281	1	1	2	2	2	2	2	2	2	2	2	2	2	2	1	2	1	1	2	2	2	2017-08-20	81.37	1	0	2020-08-22	1098	1	0	TL
P000353346	谢庆文	1	68	3	1	32.6531	1	1	2	2	2	2	2	2	2	2	2	2	2	1	1	1	2	1	#NULL!	#NULL!	#NULL!	2017-08-20	141.335	0	0	2020-08-22	1098	0	0
P000353351	徐慧萍	2	54	4	2	26.6667	1	1	2	2	2	2	2	2	2	2	2	2	2	2	1	1	1	1	2	1	2	2017-08-20	71.85	2	1	2020-08-22	1098	1	0	L4
P000354384	王玉萍	2	60	5	2	23.03	1	1	1	2	2	2	2	2	2	2	2	2	2	2	1	1	2	1	1	2	2	2017-08-26	59.875	2	1	2020-08-22	1092	1	0	TL
P000354395	郭春瑞	1	53	5	2	22.0384	2	2	2	2	2	2	2	2	1	1	2	2	1	2	2	1	1	1	#NULL!	#NULL!	#NULL!	2017-08-26	101.755	1	0	2020-08-22	1092	1	0	TL
P000354400	高俊梅	2	53	4	2	20.202	1	1	2	2	2	2	2	2	1	2	2	2	1	2	2	1	1	1	1	2	2	2017-08-26	104.435	1	0	2020-08-22	1092	0	0
P000354401	陈志强	1	53	4	2	25.0593	1	1	1	2	2	1	2	2	2	2	2	2	2	2	2	1	1	1	#NULL!	#NULL!	#NULL!	2017-08-26	130.83	0	0	2020-08-22	1092	0	0
P000354402	蔡稳萍	2	55	4	2	27.5134	1	1	2	2	2	2	2	2	2	1	2	1	1	1	1	2	1	1	2	2	2	2017-08-26	90.305	1	0	2020-08-22	1092	1	0	L
P000354414	沈青	2	56	4	2	22.0317	1	1	2	2	2	2	2	1	1	1	1	1	1	1	1	1	1	1	2	2	2	2017-08-26	82.64	1	0	2020-08-22	1092	1	0	TL
P000354418	王喜娟	2	54	5	2	26.3656	1	1	2	1	1	1	2	2	2	1	2	1	1	1	1	2	1	1	2	2	2	2017-08-26	98.58	1	0	2020-08-22	1092	0	0
P000354419	李宝来	1	54	5	2	23.04	1	1	2	2	2	2	2	2	2	2	2	2	2	1	1	2	1	1	#NULL!	#NULL!	#NULL!	2017-08-26	118.835	1	0	2020-08-22	1092	0	0
P000354420	孟香明	2	58	5	2	25.0865	1	1	1	2	2	2	2	1	1	1	1	1	2	1	2	1	1	1	2	2	2	2017-08-26	123.07	0	0	2020-08-22	1092	0	0
P000354423	何秀玲	2	65	3	1	25.8876	1	1	2	2	2	2	2	2	2	2	2	2	2	2	1	1	2	1	2	2	2	2017-08-26	85.285	1	0	2020-08-22	1092	1	0	L
P000354426	李奉财	1	54	4	2	26.2188	3	1	2	2	2	2	2	1	1	1	1	1	1	1	2	1	1	1	#NULL!	#NULL!	#NULL!	2017-08-26	166.25	0	0	2020-08-22	1092	0	0
P000354428	尤行义	2	58	4	2	21.6263	1	1	2	2	2	2	2	2	2	2	2	2	2	2	1	1	2	1	2	2	2	2017-08-26	92.925	1	0	2020-08-22	1092	1	0	TL
P000354450	宋耀怡	2	59	4	2	27.3438	1	1	1	1	1	2	2	1	2	1	1	1	1	1	1	1	1	1	2	2	2	2017-08-27	77.995	2	1	2020-09-05	1105	1	0	L
P000354473	颜云	2	60	4	2	21.4844	1	1	2	2	2	2	2	2	2	2	2	2	2	2	2	1	1	1	2	2	2	2017-08-26	66.705	2	1	2020-08-22	1092	0	0
P000354475	胡文书	1	63	3	1	26.1224	1	1	2	2	2	2	2	2	2	2	2	2	2	1	1	1	1	1	#NULL!	#NULL!	#NULL!	2017-08-26	70.035	2	1	2020-08-22	1092	2	1	TL
P000354478	李心安	2	63	3	1	24.977	1	1	2	2	2	2	2	2	2	2	2	2	2	1	1	1	1	1	2	2	2	2017-08-26	64.565	2	1	2020-08-22	1092	1	0	TL
P000354479	何光正	1	64	3	1	29.4118	1	1	2	1	1	2	2	1	1	1	1	1	1	1	1	1	1	1	#NULL!	#NULL!	#NULL!	2017-08-26	100.46	1	0	2020-08-22	1092	1	0	L2
P000354481	何光瑾	2	60	5	2	26.5731	1	1	2	2	2	2	2	2	2	2	2	2	2	1	1	1	2	1	2	2	2	2017-08-26	106.645	1	0	2020-08-22	1092	1	0	TL
P000354487	张克约	1	67	5	2	20.9573	2	1	2	2	2	2	2	2	2	2	2	2	2	2	1	1	2	1	#NULL!	#NULL!	#NULL!	2017-08-26	113.375	1	0	2020-08-22	1092	0	0
P000354490	焦庆荣	2	61	3	1	20.202	1	1	1	2	2	2	2	2	2	2	1	1	1	1	1	2	1	1	2	2	2	2017-08-26	52.49	2	1	2020-08-22	1092	2	1	L1
P000354493	李桂芝	2	59	3	1	24.6094	1	1	2	2	2	2	2	2	2	2	2	2	2	2	1	1	2	1	2	2	2	2017-08-26	107.94	1	0	2020-08-22	1092	0	0
P000354495	赵桂红	2	59	4	2	19.9219	1	1	1	2	2	2	2	2	2	2	2	2	2	2	2	2	2	2	2	2	1	2017-08-26	135.685	0	0	2020-08-30	1100	0	0
P000354500	唐立伟	2	62	4	2	24.7676	1	1	2	2	2	2	2	2	2	2	2	2	2	2	1	1	1	1	2	2	2	2017-08-26	89.31	1	0	2020-08-22	1092	1	0	TL
P000354501	王金墨	1	61	5	2	27.6361	1	2	2	2	2	2	2	2	2	2	2	2	2	2	1	1	1	1	#NULL!	#NULL!	#NULL!	2017-08-26	138	0	0	2020-08-22	1092	0	0
P000354504	何玉华	2	61	4	2	27.2932	1	1	2	2	2	2	2	2	2	2	2	1	1	1	1	1	1	1	2	2	2	2017-08-26	94.825	1	0	2020-08-22	1092	1	0	T12
P000354588	李凤精	2	69	4	2	25.7812	1	1	2	2	2	2	2	1	1	1	1	1	1	1	1	1	1	1	2	2	2	2017-08-26	75.095	2	1	2020-08-22	1092	0	0
P000355565	王丽荣	2	54	4	2	25	1	1	2	2	2	2	2	2	2	2	2	2	2	2	1	1	2	1	2	2	2	2017-08-26	142.47	0	0	2020-08-22	1092	0	0
P000355592	洪绮繁	2	48	5	2	23.8751	1	1	2	1	1	2	2	1	1	1	1	1	1	1	1	2	2	1	2	2	1	2017-09-02	201.165	0	0	2020-08-30	1093	0	0
P000355596	于凤琪	1	53	4	2	31.2213	2	1	1	2	2	2	2	2	1	1	1	1	1	1	2	1	1	1	#NULL!	#NULL!	#NULL!	2017-08-20	100.855	1	0	2020-08-22	1098	1	0	T12,L1
P000355647	张国林	1	58	4	2	22.8571	2	1	1	2	2	2	2	2	2	2	2	1	1	2	2	1	1	1	#NULL!	#NULL!	#NULL!	2017-09-02	145.47	0	0	2020-08-30	1093	0	0
P000355829	王萍	2	57	4	2	24.974	1	1	2	2	1	2	2	2	1	1	2	1	1	1	1	1	2	1	2	2	2	2017-09-02	90.66	1	0	2020-08-23	1086	0	0
P000356876	王艳霞	2	49	3	1	26.5625	1	1	2	2	2	2	2	2	1	2	2	2	2	2	2	2	2	2	2	2	1	2017-09-09	205.035	0	0	2020-08-30	1086	0	0
P000356906	郑玉芝	2	52	3	1	23.8751	1	1	2	2	2	2	2	2	2	2	2	1	2	2	1	2	1	1	2	2	2	2017-09-10	123.65	0	0	2020-08-30	1085	0	0
P000356909	邹逸祖	1	72	5	2	22.7583	2	1	2	2	1	2	2	2	1	2	1	1	1	1	2	1	1	1	#NULL!	#NULL!	#NULL!	2017-09-10	62.915	2	1	2020-12-05	1182	1	0	L
P000358017	王金山	1	55	3	1	29.0318	2	1	2	2	2	2	2	2	1	1	2	2	2	1	2	1	1	2	#NULL!	#NULL!	#NULL!	2017-09-16	84.725	1	0	2020-08-30	1079	1	0	L1
P000358026	申金霞	2	61	1	1	23.1473	1	1	1	1	1	1	1	1	1	1	1	1	1	1	1	2	1	1	2	1	2	2017-09-16	188.37	0	0	2020-09-05	1085	0	0
P000359212	袁桂霞	2	49	3	1	27.8852	1	1	1	2	2	2	2	2	2	2	2	2	2	2	2	1	1	1	2	2	1	2017-09-23	151.815	0	0	2020-09-05	1078	0	0
P000359241	赵同喜	1	68	3	1	22.571	3	2	2	2	2	2	1	1	1	1	1	1	1	1	2	1	1	1	#NULL!	#NULL!	#NULL!	2017-09-23	116.655	1	0	2020-08-30	1072	0	0
P000359243	田路琴	2	64	3	1	25.0399	1	1	1	2	2	2	2	2	1	2	2	1	2	2	1	2	1	1	2	2	2	2017-09-23	76.06	2	1	2020-08-30	1072	1	0
P000359250	夏东升	1	56	5	2	27.6817	3	2	2	2	2	2	2	2	2	1	1	1	2	1	2	2	1	2	#NULL!	#NULL!	#NULL!	2017-09-23	96.85	1	0	2020-08-30	1072	1	0	T12-L1
P000359254	张庆然	2	65	5	2	26.1719	1	1	1	2	2	2	2	2	2	2	2	2	2	2	1	1	1	1	2	2	2	2017-09-23	107.37	1	0	2020-08-30	1072	0	0
P000359255	张庆芬	2	66	4	2	20.0288	1	1	2	2	2	2	2	1	1	2	1	1	1	1	1	2	1	1	2	2	2	2017-09-23	100.165	1	0	2020-08-30	1072	2	1	L1、L3
P000359259	王立祥	1	65	4	2	25.3086	2	1	2	2	2	2	2	2	1	2	1	1	2	1	1	2	1	1	#NULL!	#NULL!	#NULL!	2017-09-23	114.55	1	0	2020-08-30	1072	0	0
P000359261	张振东	1	60	4	2	23.03	2	2	2	2	2	2	2	2	1	2	1	1	2	1	2	1	1	1	#NULL!	#NULL!	#NULL!	2017-09-24	163.065	0	0	2020-08-30	1071	0	0
P000359281	于如池	1	61	4	2	28.3447	1	2	2	2	2	2	2	2	1	2	2	1	2	2	1	1	1	1	#NULL!	#NULL!	#NULL!	2017-09-24	94.97	1	0	2020-09-05	1077	1	0
P000359284	陈宝安	1	67	3	1	28.6851	3	1	2	2	2	2	2	2	1	1	1	1	2	1	2	2	2	1	#NULL!	#NULL!	#NULL!	2017-09-24	167.27	0	0	2020-09-05	1077	0	0
P000359285	白彦玲	2	67	3	1	21.5645	1	1	2	2	2	2	2	1	1	1	1	1	1	1	1	1	2	1	2	2	2	2017-09-24	98.25	1	0	2020-09-05	1077	1	0
P000359289	杨鸿琨	1	66	3	1	22.7583	1	1	2	2	2	2	2	2	2	2	2	2	2	2	1	1	1	1	#NULL!	#NULL!	#NULL!	2017-09-24	78.12	2	1	2020-08-30	1071	1	0	T12
P000359291	吴秀敏	2	64	4	2	25.6544	1	1	1	2	2	2	2	2	1	2	2	1	2	2	2	1	2	1	2	1	2	2017-09-24	82.18	1	0	2020-08-30	1071	1	0	L
P000359292	胡国华	1	70	5	2	24.4898	3	1	2	2	2	2	2	2	2	2	2	2	2	2	1	1	1	1	#NULL!	#NULL!	#NULL!	2017-09-24	125.67	0	0	2020-08-30	1071	0	0
P000359293	王佩珍	2	61	4	2	26.8386	1	1	1	1	1	1	1	1	1	1	1	1	1	1	1	1	1	1	2	2	2	2017-09-24	81.93	1	0	2020-08-30	1071	0	0
P000359295	季茂禄	1	68	4	2	26.1962	2	1	1	2	2	2	2	2	2	2	2	2	2	2	2	1	1	1	#NULL!	#NULL!	#NULL!	2017-09-24	94.24	1	0	2020-08-30	1071	1	0	TL
P000359386	刘家骏	1	69	3	1	20.7008	1	1	2	2	2	2	2	2	2	2	2	2	2	2	1	1	1	1	#NULL!	#NULL!	#NULL!	2017-09-24	58.305	2	1	2020-12-05	1168	1	0	L
P000359388	许金章	1	73	5	2	29.7265	1	1	2	2	2	2	2	2	2	2	2	2	2	2	2	1	1	1	#NULL!	#NULL!	#NULL!	2017-09-23	93.655	1	0	2020-08-30	1072	0	0
P000359391	郑天扬	1	64	5	2	22.2753	1	1	2	2	2	2	2	1	2	2	1	2	1	1	2	1	1	1	#NULL!	#NULL!	#NULL!	2017-09-23	85.105	1	0	2020-09-05	1078	0	0
P000359393	石丕	1	65	4	2	22.6474	2	1	2	2	2	2	2	2	2	2	2	2	2	2	1	1	2	1	#NULL!	#NULL!	#NULL!	2017-09-24	99.89	1	0	2020-08-30	1071	0	0
P000359394	李金玲	2	65	3	1	22.0581	1	1	2	2	2	2	2	2	1	2	2	2	2	2	1	2	1	1	2	1	2	2017-09-24	97.28	1	0	2020-08-30	1071	0	0
P000359396	王树礼	1	62	4	2	25.5036	2	1	1	2	2	2	2	2	2	2	2	2	2	2	1	1	1	1	#NULL!	#NULL!	#NULL!	2017-09-24	93.645	1	0	2020-08-30	1071	1	0	T
P000359398	张海英	2	55	4	2	23.6244	1	1	2	2	2	2	2	2	2	2	2	2	1	1	1	1	1	1	2	2	2	2017-09-24	96.25	1	0	2020-09-05	1077	0	0
P000359452	张伟民	1	66	3	1	24.2215	2	2	1	2	2	2	1	2	2	2	2	2	2	1	1	1	1	1	#NULL!	#NULL!	#NULL!	2017-09-24	78.39	2	1	2020-08-30	1071	2	1	T12
P000359457	李丛云	2	51	5	2	26.6667	3	1	1	1	1	1	1	1	1	1	2	1	1	1	1	1	1	1	2	2	2	2017-09-24	141.415	0	0	2020-08-30	1071	0	0
P000361829	薄今晶	2	57	4	2	23.4375	1	1	2	2	2	2	2	2	2	2	2	1	1	1	1	1	1	1	2	2	2	2017-10-14	81.325	1	0	2020-08-30	1051	0	0
P000361830	邓彦玲	2	52	5	2	20.9572	1	1	2	2	2	2	2	2	1	1	2	2	2	2	2	1	2	1	2	2	2	2017-10-14	117.29	1	0	2020-09-27	1079	1	0	L2
P000361835	郭世成	1	72	5	2	20.7612	1	1	2	2	1	2	2	2	1	1	1	1	1	1	2	1	2	1	#NULL!	#NULL!	#NULL!	2017-10-14	81.685	1	0	2020-08-30	1051	2	1	T11
P000361839	杨隽	2	52	5	2	26.2596	1	1	2	2	2	2	2	1	2	1	1	1	1	1	2	2	1	1	2	1	2	2017-10-14	157.8	0	0	2020-08-30	1051	0	0
P000361844	沈建新	1	63	3	1	24.5351	2	2	2	2	2	2	2	2	2	2	2	2	2	2	1	1	1	1	#NULL!	#NULL!	#NULL!	2017-10-14	37.94	2	1	2020-08-30	1051	1	0	TL
P000361848	付镇勇	1	55	4	2	24.9135	3	1	1	2	2	2	1	2	2	2	2	2	2	2	1	1	2	1	#NULL!	#NULL!	#NULL!	2017-10-15	137.395	0	0	2020-08-30	1050	1	0	TL
P000361850	唐弘	1	64	5	2	24.2123	3	2	2	2	2	2	2	2	2	2	2	2	2	1	2	2	2	2	#NULL!	#NULL!	#NULL!	2017-10-15	82.635	1	0	2020-08-30	1050	0	0
P000361852	冯国丽	2	55	4	2	27.0552	1	1	1	2	2	2	2	2	2	2	2	2	2	2	1	1	1	1	2	1	2	2017-10-15	108.695	1	0	2020-09-05	1056	0	0
P000361858	王勇	1	60	4	2	27.7323	3	2	2	2	2	2	2	2	2	2	2	1	2	1	2	1	1	1	#NULL!	#NULL!	#NULL!	2017-10-15	92.14	1	0	2020-08-30	1050	1	0	T12-L1
P000361859	马春凤	2	58	4	2	25.2174	1	1	2	2	2	2	2	1	1	1	2	1	1	1	2	1	1	1	2	2	2	2017-10-15	109.445	1	0	2020-08-30	1050	1	0	T
P000361860	陶炳文	1	63	4	2	18.2531	3	2	2	2	1	2	2	2	1	1	2	1	1	1	1	1	1	1	#NULL!	#NULL!	#NULL!	2017-10-15	110.25	1	0	2020-08-30	1050	0	0
P000361869	冯祥云	1	59	3	1	22.8571	1	1	2	2	2	2	2	2	1	2	2	2	2	2	1	2	2	1	#NULL!	#NULL!	#NULL!	2017-10-14	65.245	2	1	2020-12-06	1149	1	0	T
P000361877	孙玉才	1	51	5	2	26.2584	3	1	1	2	2	2	2	2	2	1	2	2	1	1	2	2	2	1	#NULL!	#NULL!	#NULL!	2017-10-14	156.7	0	0	2020-08-30	1051	0	0
P000361896	常立峰	1	70	3	1	20.2449	2	1	1	1	1	2	2	2	1	1	2	2	1	1	1	2	1	1	#NULL!	#NULL!	#NULL!	2017-12-02	57.565	2	1	2020-12-05	1099	3	1	L2
P000362017	刘仕俊	2	68	5	2	23.4236	1	1	1	2	2	2	2	2	2	2	2	2	2	2	2	1	1	1	2	2	2	2017-10-14	25.88	2	1	2020-08-30	1051	1	0	TL
P000362022	李兴立	1	56	5	2	23.8281	3	2	2	2	2	2	2	1	2	1	2	1	2	1	1	2	1	1	#NULL!	#NULL!	#NULL!	2017-10-14	112.36	1	0	2020-09-06	1058	1	0
P000362028	赵雪琴	2	47	2	1	27.3438	1	1	1	2	2	2	2	2	2	2	2	2	2	2	1	1	1	1	2	2	2	2017-10-14	61.395	2	1	2020-09-05	1057	1	0	TL
P000362035	杨中菊	2	54	2	1	25.3906	1	1	2	2	2	2	2	2	2	2	2	2	2	2	1	1	1	1	2	2	2	2017-10-14	77.9	2	1	2020-09-05	1057	1	0
P000362041	孙法道	1	70	4	2	22.2041	3	1	2	2	2	2	2	2	1	2	2	2	2	2	2	2	2	2	#NULL!	#NULL!	#NULL!	2017-10-15 10:36:42	70.295	2	1	2020-08-30	1050	0	0
P000363170	窦毓林	1	73	4	2	24.9135	3	2	1	2	1	1	1	1	1	1	2	1	1	1	1	1	1	1	#NULL!	#NULL!	#NULL!	2017-10-21	60.405	2	1	2020-09-05	1050	1	0
P000363175	郭春生	2	68	4	2	30.4688	1	1	1	2	2	2	2	2	1	2	2	2	2	2	1	1	1	1	2	2	2	2017-10-21	110.385	1	0	2020-08-30	1044	0	0
P000363179	武书俊	2	60	4	2	24.3865	1	1	2	2	2	2	2	2	2	2	2	2	1	1	1	1	1	1	1	2	2	2017-10-21	109.45	1	0	2020-08-30	1044	1	0	L3
P000363184	王呈花	2	65	3	1	20.4491	1	1	1	2	2	2	2	2	1	2	1	1	1	1	1	1	2	1	1	#NULL!	2	2017-10-21	78.34	2	1	2020-08-30	1044	1	0	L2-3
P000363186	翟淑兰	2	66	4	2	22.719	1	1	1	2	2	2	2	2	2	2	2	2	2	2	1	1	1	1	2	2	2	2017-10-21	150.99	0	0	2020-09-05	1050	0	0
P000363188	李学政	1	69	3	1	23.03	3	2	2	2	2	2	1	1	1	1	1	1	1	1	1	2	1	1	#NULL!	#NULL!	#NULL!	2017-10-21	111.385	1	0	2020-09-05	1050	1	0
P000363191	栾文江	1	64	3	1	22.5827	1	1	2	2	2	2	2	2	2	2	2	2	1	1	1	1	1	1	#NULL!	#NULL!	#NULL!	2017-10-22	71.745	2	1	2020-10-31	1105	1	0	L1
P000363196	瑞秀辰	2	67	5	2	29.6158	1	1	2	1	1	1	1	2	1	2	2	2	2	2	2	1	1	1	2	2	2	2017-10-21	60.055	2	1	2020-08-30	1044	1	0	TL
P000363197	吴劲松	1	47	5	2	19.726	1	2	2	2	2	2	2	1	1	1	2	1	2	1	2	1	1	2	#NULL!	#NULL!	#NULL!	2017-10-21	128.11	0	0	2020-08-30	1044	0	0
P000363198	王宝荣	2	61	3	1	22.8624	1	1	1	1	1	2	1	2	1	1	2	1	2	1	1	1	1	1	2	2	2	2017-10-21	79.545	2	1	2020-08-30	1044	0	0
P000363200	穆秀敏	2	63	4	2	22.8624	2	1	2	2	2	2	2	1	1	2	2	2	2	1	2	1	2	1	2	2	2	2017-10-21	89.6	1	0	2020-08-30	1044	0	0
P000363205	吕建一	1	64	4	2	23.7812	1	1	2	2	2	2	2	2	2	2	2	1	1	2	2	2	1	1	#NULL!	#NULL!	#NULL!	2017-10-21	122.805	0	0	2020-08-30	1044	0	0
P000363206	吴少祺	1	69	5	2	24.8016	1	2	2	1	1	1	1	1	1	1	1	1	1	1	2	1	1	1	#NULL!	#NULL!	#NULL!	2017-10-21	105.465	1	0	2020-09-05	1050	1	0	T12
P000363208	李宝泉	1	61	4	2	22.0581	2	1	1	2	2	2	2	1	1	1	1	1	1	1	1	1	1	1	#NULL!	#NULL!	#NULL!	2017-10-21	134.445	0	0	2020-12-05	1141	0	0
P000363209	王兆洪	1	67	4	2	30.1162	1	1	2	2	2	2	2	2	2	2	2	1	1	2	2	1	1	1	#NULL!	#NULL!	#NULL!	2017-10-21	91.925	1	0	2020-08-30	1044	1	0	T12
P000363211	李进	1	72	4	2	26.9274	1	2	1	2	2	2	2	2	2	2	2	1	1	1	2	1	1	1	#NULL!	#NULL!	#NULL!	2017-10-21	75.55	2	1	2020-08-30	1044	1	0	TL
P000363212	刘自荣	2	64	3	1	31.25	1	1	1	1	1	2	2	1	1	1	1	1	1	1	1	1	1	1	2	2	2	2017-10-21	69.81	2	1	2020-09-05	1050	1	0
P000363213	宋爱军	1	64	5	2	24.0055	2	1	2	2	2	2	2	2	1	1	1	1	2	1	1	1	1	1	#NULL!	#NULL!	#NULL!	2017-10-21	68.45	2	1	2020-09-05	1050	1	0
P000363215	张玉春	1	62	3	1	24.5089	2	1	2	1	1	2	1	1	1	1	1	1	1	1	1	1	1	1	#NULL!	#NULL!	#NULL!	2017-10-21	134.04	0	0	2020-10-31	1106	0	0
P000363226	韩森林	1	60	4	2	25.8806	2	2	2	2	2	2	2	2	1	2	2	2	2	1	2	1	1	1	#NULL!	#NULL!	#NULL!	2017-10-22	99.71	1	0	2020-10-31	1105	1	0
P000363228	刘竹梅	2	63	3	1	27.6888	1	1	1	1	1	2	2	2	1	2	2	2	2	1	1	2	1	1	2	2	2	2017-10-22	104.215	1	0	2020-10-31	1105	0	0
P000363239	文福春	1	62	4	2	26.9896	1	2	2	1	1	2	1	2	1	1	2	1	1	1	1	1	1	1	#NULL!	#NULL!	#NULL!	2017-10-22	108.1	1	0	2020-10-31	1105	0	0
P000363245	张平生	1	65	5	2	24.3141	1	1	2	1	1	2	2	2	1	1	1	1	1	1	2	1	1	1	#NULL!	#NULL!	#NULL!	2017-10-22	44.69	2	1	2020-10-31	1105	2	1	L2
P000363247	宋长德	1	63	3	1	28.6661	2	1	1	2	2	2	1	1	1	1	1	1	1	1	1	1	1	1	#NULL!	#NULL!	#NULL!	2017-10-22	140.455	0	0	2020-10-31	1105	0	0
P000363249	吕玉芬	2	62	4	2	32.872	1	1	1	2	2	2	2	2	2	2	2	2	2	2	2	1	1	1	2	2	2	2017-10-22	127.725	0	0	2020-10-31	1105	0	0
P000363250	许桂芬	2	68	3	1	27.7767	1	1	2	2	2	2	2	2	2	2	2	2	2	2	1	1	2	1	2	2	2	2017-10-22	56.145	2	1	2020-10-31	1105	1	0	TL
P000363251	刘士平	1	72	4	2	20.0474	1	1	2	1	1	2	1	2	1	1	1	1	1	1	1	1	1	1	#NULL!	#NULL!	#NULL!	2017-10-22	82.84	1	0	2020-10-31	1105	0	0
P000363413	高玉明	1	70	4	2	31.0204	2	2	2	2	2	2	2	2	2	2	2	2	2	2	1	1	1	1	#NULL!	#NULL!	#NULL!	2017-10-22	94.94	1	0	2020-10-31	1105	1	0
P000364481	梁慧	2	49	5	2	26.4915	1	1	1	2	2	2	2	1	1	1	1	1	1	1	1	2	2	2	2	2	1	2017-10-28	177.825	0	0	2020-10-31	1099	0	0
P000364494	郑美荣	2	61	5	2	25.1486	1	1	2	2	2	2	2	2	2	2	2	2	2	2	1	1	1	1	2	1	2	2017-10-28	95.75	1	0	2020-10-31	1099	1	0
P000364501	王旭光	1	62	3	1	22.8374	3	1	2	2	1	2	2	2	1	1	2	2	2	1	1	2	1	1	#NULL!	#NULL!	#NULL!	2017-10-29	128.245	0	0	2020-10-31	1098	0	0
P000364502	胡淑贤	2	69	4	2	27.5312	1	1	1	2	2	2	2	2	1	2	2	1	2	2	2	1	1	1	2	2	2	2017-10-28	86.74	1	0	2020-10-31	1099	2	1	L
P000364506	董春玉	1	57	3	1	27.7634	1	1	1	2	2	2	2	2	2	2	2	1	1	1	1	1	1	1	#NULL!	#NULL!	#NULL!	2017-10-28	108.29	1	0	2020-10-31	1099	0	0
P000364507	张淑贞	2	66	3	1	25.6369	1	1	1	2	2	2	2	2	2	2	2	2	1	2	1	2	1	1	2	2	2	2017-10-28	83.56	1	0	2020-10-31	1099	1	0	L
P000364515	董盛海	1	72	4	2	24.6914	2	2	2	2	2	2	2	2	2	2	2	2	2	2	2	1	1	1	#NULL!	#NULL!	#NULL!	2017-10-28	122.405	0	0	2020-10-31	1099	1	0	TL
P000364519	徐振和	1	64	3	1	34.331	3	1	2	2	1	2	1	2	1	2	1	1	1	1	1	1	1	1	#NULL!	#NULL!	#NULL!	2017-10-29	120.935	0	0	2020-10-31	1098	0	0
P000364540	何跃林	1	66	4	2	23.939	1	1	2	2	2	2	2	2	2	2	2	2	2	2	1	2	1	1	#NULL!	#NULL!	#NULL!	2017-10-29	76.155	2	1	2020-10-31	1098	1	0
P000364543	张玉山	1	62	5	2	23.939	3	1	2	2	2	2	2	2	1	2	1	1	1	1	2	1	2	1	#NULL!	#NULL!	#NULL!	2017-10-29	139.22	0	0	2020-10-31	1098	0	0
P000364546	王金恒	1	73	5	2	22.8571	1	1	1	2	2	2	2	2	2	2	2	2	2	2	1	1	1	1	#NULL!	#NULL!	#NULL!	2017-10-29	108.435	1	0	2020-12-06	1134	0	0
P000364547	曹如凯	1	65	3	1	25.9909	3	2	2	2	2	2	2	1	1	2	2	1	2	1	2	1	2	1	#NULL!	#NULL!	#NULL!	2017-10-29	142.67	0	0	2020-10-31	1098	0	0
P000364548	刘洁	2	63	3	1	22.3081	1	1	2	2	2	2	2	2	2	2	2	2	2	2	2	1	1	1	2	2	2	2017-10-29	37.225	2	1	2020-10-31	1098	1	0
P000364557	苑克丽	2	64	3	1	23.0518	1	1	2	2	2	2	2	2	2	2	2	2	2	2	1	1	1	1	2	2	2	2017-10-29	74.835	2	1	2020-10-31	1098	0	0
P000364558	王平凡	1	66	3	1	27.9904	1	1	1	2	2	2	2	2	2	2	2	2	2	2	1	1	1	1	#NULL!	#NULL!	#NULL!	2017-10-29	112.94	1	0	2020-10-31	1098	0	0
P000364559	国明	2	57	5	2	20.8086	1	1	2	2	2	2	2	2	2	2	2	2	2	2	1	1	2	1	2	2	2	2017-10-29	85.4	1	0	2020-10-31	1098	1	0	TL
P000365635	赵荀	2	60	5	2	19.487	1	1	2	2	2	2	2	2	2	2	2	2	2	2	1	1	1	1	2	2	2	2017-11-04	128.8	0	0	2020-10-31	1092	0	0
P000365636	曹世明	1	64	4	2	28.3937	3	1	2	2	1	2	2	2	1	2	1	1	2	1	2	1	1	1	#NULL!	#NULL!	#NULL!	2017-11-04	7.95	2	1	2020-11-07	1099	2	1	T12
P000365642	林志成	1	66	5	2	28.6048	3	2	2	2	2	2	2	2	1	2	2	1	2	2	2	2	1	1	#NULL!	#NULL!	#NULL!	2017-11-04	123.735	0	0	2020-10-31	1092	0	0
P000365652	李克昌	1	70	5	2	27.6817	1	1	1	2	2	2	2	2	1	2	1	1	2	1	1	2	1	1	#NULL!	#NULL!	#NULL!	2017-11-05	116.14	1	0	2020-10-31	1091	1	0	T
P000365656	张景龙	1	65	3	1	23.6713	3	2	2	2	2	2	2	2	2	2	2	2	2	2	2	1	1	1	#NULL!	#NULL!	#NULL!	2017-11-05	34.065	2	1	2020-10-31	1091	2	1	T9
P000365659	沈建发	1	63	5	2	22.8374	2	1	2	2	2	2	2	2	2	1	2	2	1	2	1	1	1	1	#NULL!	#NULL!	#NULL!	2017-11-05	81.17	1	0	2020-10-31	1091	2	1	L2
P000365663	刘世保	1	67	3	1	26.7755	2	1	2	2	2	2	2	2	2	2	2	2	2	2	1	1	1	1	#NULL!	#NULL!	#NULL!	2017-11-05	151.58	0	0	2020-10-31	1091	0	0
P000365664	高庆生	1	63	4	2	24.2215	1	1	2	2	2	2	2	1	2	1	1	1	1	2	2	1	1	1	#NULL!	#NULL!	#NULL!	2017-11-05	92.59	1	0	2020-10-31	1091	0	0
P000365665	杨家麒	1	68	4	2	22.0932	1	1	2	2	2	2	1	2	1	1	1	1	1	1	2	2	1	1	#NULL!	#NULL!	#NULL!	2017-11-05	109.05	1	0	2020-10-31	1091	0	0
P000366912	宋亚静	2	54	4	2	25	1	1	1	2	2	2	2	2	2	2	2	2	2	1	1	1	1	1	1	1	2	2017-11-12 09:35:20	72.39	2	1	2020-10-31	1084	0	0
P000366914	李杰	1	60	3	1	23.2687	3	1	1	2	2	2	2	2	2	2	2	2	1	1	2	1	1	1	#NULL!	#NULL!	#NULL!	2017-11-12	124.675	0	0	2020-10-31	1084	0	0
P000366915	黄桂华	2	65	3	1	19.5312	1	1	1	2	2	2	2	2	2	2	2	1	1	1	1	1	1	1	2	2	2	2017-11-12	93.49	1	0	2020-10-31	1084	2	1	L1
P000366954	蔡立祥	1	66	4	2	23.4586	2	1	2	2	1	1	1	2	1	1	2	1	1	1	2	1	1	1	#NULL!	#NULL!	#NULL!	2017-11-11	123.075	0	0	2020-10-31	1085	0	0
P000366954	蔡立祥	1	66	4	2	23.4586	2	1	2	2	1	1	1	2	1	1	2	1	1	1	2	1	1	1	#NULL!	#NULL!	#NULL!	2018-03-23	135.1	0	0	2021-03-21	1093	0	0
P000366967	任西华	2	59	4	2	28.6851	1	1	2	2	2	2	2	2	1	2	1	1	2	1	1	1	2	1	2	2	2	2017-11-11	128.585	0	0	2020-10-31	1085	0	0
P000366968	李季芬	2	59	4	2	19.433	1	1	1	2	2	2	2	1	1	1	2	1	1	1	1	2	1	1	2	2	2	2017-11-11	109.16	1	0	2020-10-31	1085	0	0
P000366973	张玫	2	65	5	2	23.5304	1	1	2	2	2	2	2	2	2	2	2	2	2	2	1	1	2	1	2	2	2	2017-11-12	82.3	1	0	2020-11-07	1091	1	0
P000366975	王恩湧	1	69	4	2	22.8571	3	2	2	2	1	2	2	1	1	1	1	1	1	1	2	1	1	1	#NULL!	#NULL!	#NULL!	2017-11-12	106.085	1	0	2020-11-07	1091	0	0
P000366981	侯玉莲	2	68	4	2	27.3438	1	1	1	2	2	2	2	2	1	2	2	2	2	2	1	1	1	1	2	2	2	2017-11-12	101.155	1	0	2020-10-31	1084	0	0
P000366988	傅香云	2	63	4	2	25.7812	1	1	1	1	1	2	2	1	1	1	1	1	1	1	1	1	1	1	2	2	2	2017-11-12	76.15	2	1	2020-10-31	1084	1	0	L
P000366991	张建华	1	62	3	1	26.5731	2	2	2	2	2	2	2	2	2	2	2	2	2	2	2	2	1	1	#NULL!	#NULL!	#NULL!	2017-11-12	91.42	1	0	2020-10-31	1084	1	0	L
P000366992	安金玲	2	63	4	2	25.6874	1	1	2	2	2	2	2	2	2	2	2	2	2	2	1	1	1	1	2	2	2	2017-11-12	104.075	1	0	2020-10-31	1084	0	0
P000366995	魏青	1	65	3	1	22.0386	3	2	1	2	2	2	2	2	2	2	2	2	2	2	1	1	1	1	#NULL!	#NULL!	#NULL!	2017-11-25	57.995	2	1	2021-01-09	1141	1	0
P000366997	王宗华	2	59	3	1	27.3438	1	1	2	2	2	2	2	2	1	2	2	2	2	2	1	1	1	1	2	2	2	2017-11-12	109.905	1	0	2020-10-31	1084	0	0
P000368115	刘文琴	2	56	4	2	27.3438	1	1	2	2	1	2	2	2	2	1	2	1	2	2	1	1	1	1	2	2	2	2017-11-18 10:38:56	111.865	1	0	2020-10-31	1078	0	0
P000368134	王艳荣	2	57	4	2	42.5981	1	1	1	2	2	2	2	2	2	2	2	2	2	2	1	1	1	1	2	2	2	2017-11-18	96.13	1	0	2020-10-31	1078	1	0
P000368135	王善举	1	69	3	1	25.8645	3	1	2	2	2	2	2	2	2	2	2	2	2	2	2	1	1	1	#NULL!	#NULL!	#NULL!	2017-11-18	112.285	1	0	2020-10-31	1078	0	0
P000368141	高德利	1	62	5	2	25.5296	1	1	2	1	1	2	1	2	1	2	2	1	2	1	2	1	1	1	#NULL!	#NULL!	#NULL!	2017-11-18	182.95	0	0	2020-10-31	1078	0	0
P000368142	周选民	1	61	3	1	23.5883	1	1	1	2	2	2	2	2	1	1	2	2	2	2	2	1	2	1	#NULL!	#NULL!	#NULL!	2017-11-18	119.49	1	0	2020-10-31	1078	0	0
P000368143	刘秀琴	2	61	2	1	24.3046	1	1	2	2	2	2	2	2	2	2	1	1	2	1	1	1	2	1	2	2	2	2017-11-18	127	0	0	2020-10-31	1078	1	0	L
P000368145	陈树珍	1	70	5	2	24.5089	3	1	2	2	2	2	2	1	1	1	1	1	1	1	2	1	1	1	#NULL!	#NULL!	#NULL!	2017-11-19	98.32	1	0	2020-11-07	1084	0	0
P000368150	党读检	1	61	3	1	23.4375	2	1	2	2	2	2	2	1	1	1	1	1	1	1	2	1	1	1	#NULL!	#NULL!	#NULL!	2017-11-26	103.7	1	0	2020-11-07	1077	1	0
P000368156	季玉富	1	60	3	1	22.0386	2	1	1	2	2	2	2	1	1	1	2	1	1	1	2	1	1	1	#NULL!	#NULL!	#NULL!	2017-11-19	92.845	1	0	2020-11-07	1084	2	1	L3
P000368167	刘红玲	2	49	1	1	35.1534	1	1	2	2	2	2	2	1	1	1	1	1	2	1	1	2	1	1	2	2	1	2017-11-25	169.815	0	0	2020-11-07	1078	0	0
P000369352	凌耀华	2	69	3	1	22.0386	1	1	1	2	1	2	2	2	1	2	2	2	2	2	2	1	1	1	2	1	2	2017-11-25	117.385	1	0	2020-11-15	1086	1	0
P000369358	陈慧茹	2	54	4	2	21.2306	1	1	2	2	2	2	2	2	2	2	2	2	2	2	1	1	2	1	2	2	2	2017-11-25	64.77	2	1	2020-11-07	1078	0	0
P000369363	李素真	2	63	1	1	22.2222	1	1	1	2	2	2	2	2	2	2	2	2	2	2	1	1	1	1	2	2	2	2017-11-25	45.62	2	1	2020-11-07	1078	1	0
P000369368	刘金娟	2	64	3	1	23.6128	1	1	1	2	2	2	2	2	2	2	2	1	1	1	1	2	1	1	2	2	2	2017-11-25	85.915	1	0	2020-11-07	1078	1	0
P000369369	孙淑兰	2	63	5	2	26.7094	1	1	1	2	2	2	2	2	2	2	2	1	1	1	1	2	1	1	1	#NULL!	2	2017-11-25	73.585	2	1	2020-11-07	1078	1	0
P000369370	房兰竹	2	72	4	2	20.5761	1	1	2	2	2	2	2	2	2	2	2	2	2	2	1	1	1	1	2	2	2	2017-11-25 10:34:19	43.095	2	1	2020-11-07	1078	1	0
P000369382	张爱荣	2	57	4	2	18.9866	1	1	2	2	2	2	2	2	2	2	2	2	2	2	1	2	1	2	2	2	2	2017-11-26	84.865	1	0	2020-11-07	1077	0	0
P000369386	苏宝珠	1	65	3	1	16.5289	2	2	2	2	1	1	1	1	1	1	1	1	1	1	2	1	1	1	#NULL!	#NULL!	#NULL!	2017-11-26	195.26	0	0	2020-11-07	1077	0	0
P000369392	张效旭	1	64	4	2	23.1834	1	1	1	2	2	2	2	2	2	1	2	1	1	1	2	2	1	1	#NULL!	#NULL!	#NULL!	2017-11-26	118.64	1	0	2020-11-07	1077	0	0
P000374033	贾汉领	2	61	3	1	17.3313	1	1	1	2	2	2	2	2	2	2	2	2	2	2	1	1	2	1	2	1	2	2018-03-13	88.29	1	0	2021-03-07	1089	0	0
P000377487	丰林强	1	62	2	1	23.03	2	1	1	2	2	2	2	1	1	1	1	1	1	1	2	1	1	1	#NULL!	#NULL!	#NULL!	2018-01-13 09:04:37	105.695	1	0	2021-03-07	1149	2	1	L1
P000378663	李志云	2	58	4	2	24.4646	1	1	2	2	2	2	2	2	2	1	2	1	1	2	1	1	1	1	2	2	2	2018-03-13	104.35	1	0	2021-03-07	1089	0	0
P000380782	徐淑琴	2	57	4	2	22.2656	1	1	2	2	2	2	2	2	2	2	2	2	2	2	2	2	2	2	2	2	2	2018-02-03 10:07:28	119.12	1	0	2021-03-27	1148	0	0
P000383787	王树强	1	67	4	2	20.5499	2	1	1	1	1	2	2	1	1	1	1	1	1	1	1	2	1	1	#NULL!	#NULL!	#NULL!	2018-03-03 09:03:36	64.155	2	1	2021-03-27	1120	1	0
P000383808	蒋宝林	1	69	5	2	22.1453	3	1	1	2	2	2	2	1	1	1	1	2	1	1	2	2	1	1	#NULL!	#NULL!	#NULL!	2018-03-04 10:11:18	47.11	2	1	2021-03-27	1119	1	0
P000385202	祝秋莲	2	57	4	2	25.3906	1	1	1	2	2	2	2	2	1	2	2	1	1	1	1	1	1	1	2	2	2	2018-03-11 09:55:36	118.35	1	0	2021-03-27	1112	0	0
P000386565	孟庆芳	2	55	5	2	20.5688	1	1	1	2	2	2	2	2	1	1	1	1	1	1	1	1	1	1	2	2	2	2018-03-17 09:10:41	50.7	2	1	2021-03-27	1106	1	0
P000387895	刘勇	1	66	4	2	25.5354	3	1	2	2	2	2	2	2	2	2	2	2	2	2	2	1	1	1	#NULL!	#NULL!	#NULL!	2018-03-24 10:16:39	66.75	2	1	2021-03-27	1099	1	0
P000387901	李洪娣	2	59	4	2	23.2335	1	1	2	2	2	2	2	2	2	2	2	2	2	2	2	1	1	2	2	1	2	2018-03-24 09:36:44	107.94	1	0	2021-03-27	1099	0	0
P000396163	陈鸿英	2	54	4	2	28.2284	1	1	1	2	1	2	2	2	1	2	2	1	2	1	1	2	2	1	2	1	1	2018-04-18	148.3	0	0	2021-04-18	1095	0	0
P000396165	褚凤娥	2	63	2	2	25.7117	3	1	1	2	2	2	2	1	1	1	2	1	1	1	1	1	1	1	2	2	2	2018-04-18	49.9	2	1	2021-04-18	1095	0	0
P000396167	范桂荣	2	58	3	1	31.2213	1	1	2	2	2	2	2	2	2	2	2	1	2	1	2	1	2	2	2	2	2	2018-04-18	121.4	0	0	2021-04-18	1095	0	0
P000396182	李荣庆	1	65	5	2	26.8274	2	1	2	2	2	2	2	2	2	2	2	2	2	2	1	1	1	1	#NULL!	#NULL!	#NULL!	2018-04-18	117.9	1	0	2021-04-18	1095	0	0
P000396186	孟祥金	2	56	4	2	22.6562	1	1	2	2	1	2	2	2	1	2	2	2	2	2	1	1	2	1	2	2	2	2018-04-18	90.9	1	0	2021-04-18	1095	0	0
P000396191	孙秀玲	2	60	3	1	23.9621	2	1	1	2	2	1	2	1	1	1	1	1	1	1	1	2	1	1	2	2	2	2018-04-18	72.3	2	1	2021-04-18	1095	1	0
P000396192	唐湘苓	2	66	3	1	23.4375	1	1	1	2	1	2	2	2	1	1	1	1	1	1	1	2	1	1	2	2	2	2018-04-18	88.2	1	0	2021-04-18	1095	1	0
P000396197	王淑芳	2	62	4	2	26.2222	1	1	2	2	1	2	2	2	1	2	2	1	2	1	1	1	1	1	2	1	2	2018-04-18	123.8	0	0	2021-04-18	1095	0	0
P000396206	张殿英	2	52	2	2	24.1415	1	2	2	2	2	2	2	1	1	1	1	1	1	1	1	1	1	1	2	2	2	2018-04-18	70.2	2	1	2021-04-18	1095	1	0
P000396208	张惠芝	2	59	4	2	27.6817	1	1	2	2	2	2	2	2	2	2	2	1	1	1	1	2	2	1	2	2	2	2018-04-18	157.9	0	0	2021-04-18	1095	0	0
P000396211	张俊兰	2	55	3	1	25.9516	1	1	1	2	1	2	2	2	2	2	2	1	2	1	1	1	2	2	2	2	2	2018-04-18	76.5	2	1	2021-04-18	1095	1	0
P000396216	赵宝玲	2	64	3	1	22.0317	1	1	1	2	2	2	2	1	1	1	1	1	1	1	1	1	1	1	2	2	2	2018-04-18	51.1	2	1	2021-04-18	1095	3	1
P000396231	杜占敏	2	57	4	2	29.1363	1	1	1	2	2	2	2	1	1	1	1	1	1	1	1	1	1	1	2	2	2	2018-04-18	109.1	1	0	2021-04-18	1095	0	0
P000396248	李钢	1	53	3	1	24.2215	1	1	2	2	2	2	2	2	1	1	2	1	1	2	1	1	1	1	#NULL!	#NULL!	#NULL!	2018-04-18	130.5	0	0	2021-04-18	1095	0	0
P000396269	鲁士奇	1	64	5	2	26.8923	3	2	2	2	2	2	2	2	1	1	2	2	1	1	2	2	2	2	#NULL!	#NULL!	#NULL!	2018-04-18	65.1	2	1	2021-04-18	1095	2	1
P000396278	明德和	1	57	3	1	19.433	2	2	2	2	2	2	2	2	2	2	2	2	2	2	1	1	1	1	#NULL!	#NULL!	#NULL!	2018-04-18	60.9	2	1	2021-04-18	1095	1	0
P000396289	唐淑珍	2	60	4	2	23.8751	1	1	1	2	2	2	2	1	2	1	1	2	1	1	1	2	1	1	2	2	2	2018-04-18	75.1	2	1	2021-04-18	1095	1	0
P000396299	吴国兴	1	54	4	2	25.3515	2	1	2	2	2	2	2	2	2	2	2	2	2	2	2	1	1	1	#NULL!	#NULL!	#NULL!	2018-04-18	91.54	1	0	2021-04-18	1095	1	0
P000396302	邢泽芬	2	58	4	2	22.6003	1	1	1	2	2	2	2	2	1	2	2	1	2	2	1	2	1	1	2	2	2	2018-04-18	87	1	0	2021-04-18	1095	1	0
P000396308	杨桂合	1	62	3	1	23.1206	3	1	2	2	2	2	2	1	1	1	1	1	1	1	1	1	1	1	#NULL!	#NULL!	#NULL!	2018-04-18	124.9	0	0	2021-04-18	1095	0	0
P000396318	张宝玉	1	62	3	1	22.3094	1	1	2	1	2	2	2	2	2	2	2	2	2	1	2	2	1	1	#NULL!	#NULL!	#NULL!	2018-04-18	161.7	0	0	2021-04-18	1095	0	0
P000396319	张翠仙	2	64	3	1	25.3906	1	1	2	1	2	2	2	2	2	2	2	2	2	1	1	2	1	1	2	2	2	2018-04-18	46.8	2	1	2021-04-18	1095	1	0
P000396328	周冀英	2	63	3	1	24.3418	1	1	2	2	2	2	2	1	1	1	2	1	1	1	1	1	2	1	2	1	2	2018-04-18	140.1	0	0	2021-04-18	1095	0	0
P000400915	王丽	2	55	3	1	24.6094	1	1	2	1	1	2	2	2	2	1	2	1	1	2	1	1	1	1	2	2	2	2018-05-26	116.155	1	0	2020-08-01	798	0	0
P000400952	杜建华	1	71	3	1	24.8016	1	1	1	2	2	2	2	1	1	1	1	1	1	1	1	1	1	1	#NULL!	#NULL!	#NULL!	2018-06-26	123.2	0	0	2021-06-26	1095	0	0
P000402354	周俊兰	2	59	4	2	32.4622	2	2	1	2	2	2	2	2	2	2	2	2	2	1	2	1	1	1	2	1	2	2018-06-02	102.41	1	0	2020-12-06	918	0	0
P000402372	于秀芬	2	70	2	2	25.6821	1	1	1	2	2	2	2	2	2	2	2	2	1	1	1	2	2	1	2	2	2	2018-06-20	100.8	1	0	2021-06-20	1095	0	0
P000402400	张春海	1	64	4	2	19.4444	3	1	2	2	1	1	1	2	1	2	2	2	1	1	1	1	2	1	#NULL!	#NULL!	#NULL!	2018-06-20	78	2	1	2021-06-20	1095	1	0
P000402401	李建英	2	62	3	1	21.4844	1	1	1	1	2	2	2	2	2	2	2	2	1	1	1	2	1	1	2	2	2	2018-06-20	65.9	2	1	2021-06-20	1095	0	0
P000402414	刘能香	2	46	3	1	23.6244	1	1	1	2	1	2	2	1	1	1	2	1	1	1	2	1	1	1	2	1	1	2018-06-03	156.565	0	0	2020-09-06	826	0	0
P000402414	刘能香	2	46	3	1	23.6244	1	1	1	2	1	2	2	1	1	1	2	1	1	1	2	1	1	1	2	1	1	2018-06-20	158.6	0	0	2021-06-20	1095	0	0
P000402425	刘贵英	2	61	4	2	29.5525	1	1	1	2	1	2	2	2	1	2	2	2	2	2	1	1	1	1	2	2	2	2018-06-02	88.6	1	0	2020-08-02	792	1	0	T 陈旧
P000402451	秦跃凤	2	58	5	2	21.7555	1	1	1	2	2	2	2	2	1	2	2	1	1	1	2	2	2	2	2	1	2	2018-06-20	116.7	1	0	2021-06-20	1095	0	0
P000402453	邱莉生	2	64	3	1	25.6312	1	1	2	2	2	2	2	2	2	1	2	1	1	1	2	2	2	2	2	2	2	2018-06-20	97.6	1	0	2021-06-20	1095	1	0
P000402466	孙怡兰	2	62	3	1	20.202	1	1	1	1	2	2	1	1	1	1	1	1	1	1	1	1	1	1	2	2	2	2018-06-20	63.3	2	1	2021-06-20	1095	2	1
P000402506	许芳君	2	60	3	1	19.433	1	1	1	1	1	2	1	2	1	2	2	1	2	2	1	1	2	1	2	2	2	2018-06-20	76.4	2	1	2021-06-20	1095	0	0
P000402509	田兆模	1	64	5	2	22.8571	2	2	2	1	2	2	2	2	2	2	2	2	2	1	1	1	1	1	#NULL!	#NULL!	#NULL!	2018-06-20	72	2	1	2021-06-20	1095	2	1
P000402602	张连英	2	64	3	1	20.5049	1	1	1	1	2	2	1	1	1	1	1	2	1	1	1	2	1	1	2	2	2	2018-06-20	60.1	2	1	2021-06-20	1095	1	0
P000403712	张树杰	1	54	4	2	28.4005	1	1	1	2	2	2	2	1	1	1	2	1	1	1	1	1	1	1	#NULL!	#NULL!	#NULL!	2018-06-26	114.9	1	0	2021-06-26	1095	1	0
P000403713	张树琴	2	62	3	1	30.4832	1	1	1	2	2	2	2	1	1	1	1	1	1	1	1	2	1	1	2	2	2	2018-06-26	71.5	2	1	2021-06-26	1095	1	0
P000403728	朱性礼	1	63	3	1	25.8645	2	2	2	2	2	2	2	2	1	1	2	2	1	1	2	2	2	1	#NULL!	#NULL!	#NULL!	2018-06-26	129.2	0	0	2021-06-26	1095	0	0
P000403742	吴树新	1	54	4	2	23.5294	1	1	2	2	2	2	2	2	2	2	2	2	2	1	1	1	1	1	#NULL!	#NULL!	#NULL!	2018-06-20	107.1	1	0	2021-06-20	1095	0	0
P000403746	胡深旗	1	57	4	2	24.6914	3	2	1	2	2	2	2	1	1	2	2	1	2	1	1	1	1	1	#NULL!	#NULL!	#NULL!	2018-06-20	111.6	1	0	2021-06-20	1095	0	0
P000403755	姚德永	1	66	4	2	26.2596	1	1	1	2	2	2	2	2	2	2	2	1	2	1	1	1	1	1	#NULL!	#NULL!	#NULL!	2018-06-20	67.6	2	1	2021-06-20	1095	0	0
P000403778	张青	2	50	4	2	25.9516	1	1	1	2	2	2	2	2	2	2	2	2	2	1	1	2	1	1	2	1	1	2018-06-20	114	1	0	2021-06-20	1095	0	0
P000403780	张阳	2	62	3	1	26.3702	1	1	1	1	2	2	2	2	2	2	2	2	1	1	1	2	1	1	2	2	2	2018-06-20	52.6	2	1	2021-06-20	1095	1	0
P000403803	刘玉水	1	63	4	2	23.1206	2	1	1	1	1	2	2	1	2	2	2	1	1	1	1	1	1	1	#NULL!	#NULL!	#NULL!	2018-06-20	97.8	1	0	2021-06-20	1095	0	0
P000403833	王世海	1	56	4	2	25.4694	1	1	2	2	2	2	2	2	2	2	2	2	2	2	1	1	1	1	#NULL!	#NULL!	#NULL!	2018-06-26	91.2	1	0	2021-06-26	1095	1	0
P000403873	丁权	1	48	4	2	27.7551	2	2	1	2	2	2	2	2	1	2	2	2	2	2	1	1	1	1	#NULL!	#NULL!	#NULL!	2018-06-26	99.2	1	0	2021-06-26	1095	1	0
P000403888	郝岗	1	60	4	2	25.0593	1	1	1	2	2	2	2	2	1	2	2	1	1	1	2	2	1	1	#NULL!	#NULL!	#NULL!	2018-06-26	80.2	1	0	2021-06-26	1095	0	0
P000403895	兰英芹	2	66	4	2	26.2336	1	1	2	2	2	2	2	2	1	1	2	1	1	1	2	1	1	1	2	2	2	2018-06-26	122.8	0	0	2021-06-26	1095	0	0
P000403905	李学惠	2	58	4	2	28.1943	1	1	2	2	1	2	2	1	1	1	1	2	2	2	1	1	2	1	2	1	2	2018-06-26	107.8	1	0	2021-06-26	1095	0	0
P000403919	马洪荣	2	59	4	2	24.4646	1	1	1	2	1	2	2	2	1	2	2	2	2	2	1	1	1	1	2	2	2	2018-06-26	96.1	1	0	2021-06-26	1095	0	0
P000403921	孟继敏	2	64	3	1	26.1427	1	1	1	2	2	2	2	2	1	1	2	1	1	1	1	2	2	1	2	1	2	2018-06-26	133	0	0	2021-06-26	1095	1	0
P000403925	彭新英	2	60	3	1	25.9695	1	1	1	2	2	2	2	2	1	2	2	1	1	1	1	1	1	1	2	2	2	2018-06-26	121.8	0	0	2021-06-26	1095	1	0
P000403942	王秀芝	2	49	5	2	24.2188	1	1	2	2	2	2	2	2	2	2	2	2	2	1	2	1	1	1	2	2	2	2018-06-26	119.1	1	0	2021-06-26	1095	0	0
P000403944	王月敏	2	63	4	2	22.4913	1	1	2	2	2	2	2	1	1	1	1	2	1	1	2	1	2	1	2	2	2	2018-06-26	95.5	1	0	2021-06-26	1095	1	0
P000403946	王振信	1	67	3	1	23.6244	2	1	2	2	2	2	2	2	2	1	2	2	1	1	1	1	1	1	#NULL!	#NULL!	#NULL!	2018-06-26	91.7	1	0	2021-06-26	1095	1	0
P000403950	阎玉琴	2	71	4	2	21.0962	1	2	2	2	1	2	2	2	2	2	2	2	2	2	1	1	1	1	2	2	2	2018-06-26	59.5	2	1	2021-06-26	1095	1	0
P000403951	杨金娥	2	57	4	2	24.1672	1	1	2	2	2	2	2	2	2	2	2	2	2	2	1	2	1	1	2	2	2	2018-06-26	91.6	1	0	2021-06-26	1095	0	0
P000403952	杨易新	1	62	3	1	22.5309	1	2	2	2	2	2	2	2	1	1	2	2	1	1	2	1	1	1	#NULL!	#NULL!	#NULL!	2018-06-26	117.9	1	0	2021-06-26	1095	0	0
P000403957	张坚	1	62	3	1	26.5731	2	1	2	2	2	2	1	2	1	2	2	2	1	1	1	2	1	2	#NULL!	#NULL!	#NULL!	2018-06-26	91.4	1	0	2021-06-26	1095	0	0
P000405154	李华	2	60	4	2	21.4536	1	1	1	2	2	2	2	2	1	1	2	1	1	1	2	2	2	1	2	2	2	2018-06-26	104.6	1	0	2021-06-26	1095	0	0
P000405162	李秀荣	2	64	3	1	24.7475	1	1	2	2	2	2	2	2	2	1	2	1	1	1	1	1	1	1	2	1	2	2018-06-26	57.4	2	1	2021-06-26	1095	0	0
P000405165	李玉兰	2	56	4	2	22.9421	1	1	1	2	2	2	2	2	1	1	2	1	1	1	1	2	2	1	1	#NULL!	2	2018-06-26	60.3	2	1	2021-06-26	1095	0	0
P000405186	朱光敏	2	59	4	2	23.6652	1	1	2	2	2	2	2	2	1	2	2	1	1	1	1	1	2	1	2	2	2	2018-06-26	143	0	0	2021-06-26	1095	0	0
P000407907、621203	王明友	1	54	5	2	23.03	1	1	1	2	2	2	2	2	2	2	2	2	2	2	1	1	1	1	#NULL!	#NULL!	#NULL!	2018-06-20	133	0	0	2021-06-20	1095	1	0
P000477300	姜玉鸾	2	66	3	1	26.1066	1	1	1	2	2	2	2	2	1	2	2	1	1	2	1	2	1	1	2	1	2	2019-08-11	104.295	1	0	2020-08-16	371	0	0
P000478533	刘家田	2	73	5	2	25.9695	1	1	1	2	2	2	2	2	2	2	2	2	1	2	2	2	1	2	2	2	2	2019-07-20	69.47	2	1	2020-08-22	399	0	0
P000481403	陈淑明	2	57	4	2	25.711	2	1	2	2	2	2	2	2	2	2	2	2	2	2	1	1	1	1	2	2	2	2019-08-03	144.04	0	0	2020-09-06	400	0	0
P000481404	李炳云	1	66	4	2	24.1633	2	1	1	2	2	2	2	2	1	1	1	1	1	1	1	1	1	1	#NULL!	#NULL!	#NULL!	2019-08-04	72.64	2	1	2020-09-06	399	1	0	TL
P000481419	李涛	1	57	5	2	25.5102	2	1	2	2	2	2	2	2	1	2	2	1	2	2	2	1	1	1	#NULL!	#NULL!	#NULL!	2019-08-04	61.15	2	1	2020-09-06	399	2	1	T6
P000481421	郭增良	1	64	4	2	30.7934	3	1	1	2	2	2	1	1	1	1	1	1	2	1	2	1	1	1	#NULL!	#NULL!	#NULL!	2019-08-03	74.23	2	1	2020-09-06	400	1	0	L
P000481441	李宪临	1	65	3	1	27.6817	2	1	1	2	2	2	2	1	1	2	2	1	2	1	1	2	2	1	#NULL!	#NULL!	#NULL!	2019-08-03	102.695	1	0	2020-09-06	400	1	0
P000481449	梁永宽	1	61	4	2	21.7738	2	1	2	2	2	2	2	2	2	2	2	2	2	2	1	1	1	1	#NULL!	#NULL!	#NULL!	2019-08-03	89.765	1	0	2020-09-06	400	1	0	L
P000481462	陆利新	1	58	4	2	25.9516	2	1	1	2	2	2	2	1	1	1	1	1	1	1	1	1	1	1	#NULL!	#NULL!	#NULL!	2019-08-03	124.865	0	0	2020-09-06	400	0	0
P000481507	赵佩学	1	68	3	1	20.3383	2	2	1	2	2	2	2	2	2	2	2	2	2	2	2	1	1	1	#NULL!	#NULL!	#NULL!	2019-08-03	92.66	1	0	2020-09-06	400	3	1	L2
P000481513	张志刚	1	59	3	1	24.7721	1	1	2	1	2	2	2	2	1	2	2	1	1	1	1	1	1	1	#NULL!	#NULL!	#NULL!	2019-08-04	97.055	1	0	2020-09-06	399	1	0
P000481529	王世伟	1	59	3	1	25.7959	2	1	2	2	2	2	2	2	2	2	2	2	2	2	1	1	1	1	#NULL!	#NULL!	#NULL!	2019-08-03	111.82	1	0	2020-09-06	400	0	0
P000481542	杨文智	1	67	3	1	29.8606	2	1	2	2	2	2	2	1	1	2	2	2	1	2	1	1	1	1	#NULL!	#NULL!	#NULL!	2019-08-03	75.89	2	1	2020-09-06	400	2	1	L1
P000481545	张德福	1	70	4	2	23.3556	2	2	1	2	2	2	2	2	1	2	2	1	2	1	2	1	1	1	#NULL!	#NULL!	#NULL!	2019-08-03	65.305	2	1	2020-09-06	400	1	0
P000483016	董振久	1	61	4	2	27.6817	2	2	2	2	2	2	2	2	1	1	1	1	2	1	2	1	1	1	#NULL!	#NULL!	#NULL!	2019-08-11	84.135	1	0	2020-09-26	412	2	1	L
P000483018	范大勇	1	65	5	2	28.7274	2	1	1	2	2	2	2	2	2	2	2	2	2	1	2	1	1	1	#NULL!	#NULL!	#NULL!	2019-08-11	208.71	0	0	2020-09-06	392	0	0
P000483028	郝淑云	2	56	1	1	25.1486	3	1	2	1	2	2	1	1	1	2	1	1	2	1	1	1	1	1	2	2	2	2019-08-11	79.12	2	1	2020-09-06	392	3	1	L2
P000483053	吴树生	1	73	3	1	23.4075	3	1	2	2	2	2	2	2	2	2	2	2	2	2	2	1	1	1	#NULL!	#NULL!	#NULL!	2020-09-06	100.09	1	0	2020-09-26	20	0	0
P000483058	许春梅	2	54	4	2	16.7488	2	1	2	2	2	2	2	2	2	2	2	2	2	2	2	2	2	1	2	2	2	2019-08-11	70.04	2	1	2020-09-26	412	1	0	L2
P000483071	张金彦	1	57	4	2	25.6055	3	1	1	2	2	2	2	2	1	1	2	1	2	1	2	1	1	1	#NULL!	#NULL!	#NULL!	2019-08-18	139.425	0	0	2020-09-06	385	0	0
P000483086	张正敏	2	71	4	2	22.3478	1	1	2	2	2	2	2	2	2	2	2	2	2	2	2	2	1	1	1	#NULL!	2	2019-08-11	84.975	1	0	2020-09-06	392	1	0
P000483099	宋少宏	1	56	3	1	23.5237	2	1	2	2	2	2	2	2	2	2	2	2	2	2	1	2	1	1	#NULL!	#NULL!	#NULL!	2019-08-10	117.86	1	0	2020-08-22	378	1	0	T
P000483114	马长山	1	66	3	1	21.2245	2	2	2	2	2	2	2	2	2	2	2	2	2	2	2	1	1	1	#NULL!	#NULL!	#NULL!	2019-08-11	83.085	1	0	2020-09-06	392	0	0
P000483144	钟振军	1	59	5	2	24.2215	2	1	2	2	2	2	2	2	1	2	1	1	2	1	2	1	2	1	#NULL!	#NULL!	#NULL!	2019-08-10	125.975	0	0	2020-09-06	393	0	0
P000484596	王书刚	1	58	4	2	26.6097	2	1	1	2	2	2	2	2	2	2	2	2	2	2	2	1	1	1	#NULL!	#NULL!	#NULL!	2019-08-17	54.975	2	1	2020-09-06	386	1	0	L2
P000484598	徐维红	2	62	3	1	20.2848	1	1	1	2	2	2	1	2	1	1	1	2	2	1	2	1	1	1	2	1	2	2019-08-17	61.025	2	1	2020-08-22	371	2	1	L1
P000484658	李维庄	1	61	4	2	24.1633	2	1	2	2	2	2	2	2	2	2	2	2	2	2	2	1	1	1	#NULL!	#NULL!	#NULL!	2019-08-18	160.33	0	0	2020-09-06	385	0	0
P000484667	王健萍	2	58	4	2	24.4646	2	1	1	2	2	2	2	1	1	1	1	1	2	1	1	1	1	1	2	2	2	2019-08-18	67.73	2	1	2020-09-06	385	1	0
P000487975	苏昕	2	47	5	2	22.0741	1	1	2	2	2	2	2	1	1	1	1	1	1	1	1	2	1	1	2	2	1	2019-08-31	163.095	0	0	2020-08-22	357	0	0
P000492372	张慧	1	61	3	1	25.0995	3	1	1	2	1	2	2	2	2	2	2	2	2	2	2	1	1	1	#NULL!	#NULL!	#NULL!	2019-09-21	81.62	1	0	2020-11-15	421	1	0	L1
P000492504	秦维康	1	59	4	2	24.8356	2	1	1	2	2	2	2	2	2	2	2	2	2	2	2	1	1	1	#NULL!	#NULL!	#NULL!	2019-09-22	106.72	1	0	2020-11-15	420	1	0	TL
P000497876	张寿发	1	68	3	1	22.921	2	2	1	2	2	2	1	2	1	2	2	2	1	1	1	1	1	1	#NULL!	#NULL!	#NULL!	2018-03-13	58.21	2	1	2021-03-07	1089	1	0
P000499426	姜洪禄	1	61	4	2	25.3515	2	1	2	2	2	2	2	2	2	2	2	2	2	2	2	1	1	1	#NULL!	#NULL!	#NULL!	2018-03-13	72.76	2	1	2021-03-07	1089	2	1
P000499489	杨明林	1	65	4	2	24.9135	3	1	2	2	2	2	2	2	2	2	2	2	2	2	1	2	1	1	#NULL!	#NULL!	#NULL!	2018-03-13	124.22	0	0	2021-03-07	1089	0	0
P000501117	李锦珠	1	72	3	1	21.6713	2	2	2	2	2	2	2	1	1	1	1	1	1	1	1	2	1	1	#NULL!	#NULL!	#NULL!	2018-03-13	121.2	0	0	2021-03-07	1089	0	0
P000502678	刘志良	1	61	4	2	25.8806	3	1	2	2	2	2	2	2	2	1	2	2	1	1	2	2	1	1	#NULL!	#NULL!	#NULL!	2018-03-13	89.36	1	0	2021-03-07	1089	0	0
P000502691	王金丽	2	70	4	2	21.875	3	2	2	2	2	2	1	1	1	1	1	2	1	1	1	1	2	1	2	1	2	2018-03-13	62.92	2	1	2021-03-07	1089	0	0
P000502700	夏春良	1	61	3	1	25.9516	2	2	2	2	2	2	2	2	1	1	2	2	1	1	1	2	1	1	#NULL!	#NULL!	#NULL!	2018-03-13	105.71	1	0	2021-03-07	1089	0	0
P000502712	张七生	1	56	4	2	26.8166	2	1	1	1	2	2	2	1	1	1	1	1	1	1	2	1	1	1	#NULL!	#NULL!	#NULL!	2018-03-13	106.2	1	0	2021-03-07	1089	1	0
P000502717	张永进	1	66	4	2	23.6614	3	2	2	2	2	2	1	2	2	1	1	1	2	2	1	1	1	1	#NULL!	#NULL!	#NULL!	2018-03-23	150.8	0	0	2021-03-21	1093	0	0
P000502721	曹健民	1	66	3	1	21.2585	2	2	1	2	2	2	2	1	1	1	1	1	1	1	2	1	1	1	#NULL!	#NULL!	#NULL!	2019-11-03	115.665	1	0	2020-09-06	308	0	0
P000504573	赵国良	1	56	5	2	22.4913	2	1	2	2	2	2	1	1	1	1	2	2	2	1	2	1	1	1	#NULL!	#NULL!	#NULL!	2019-11-10	91.435	1	0	2020-11-07	363	1	0
P000506794	盛越	1	51	5	2	22.2222	2	2	1	2	2	2	2	2	2	2	2	2	2	2	1	2	1	1	#NULL!	#NULL!	#NULL!	2018-03-23	147.7	0	0	2021-03-21	1093	0	0
P000508402	于莹	2	70	3	1	25.7117	1	1	2	2	2	2	2	2	2	2	2	2	2	2	1	2	1	1	2	2	2	2018-03-23	86.5	1	0	2021-03-21	1093	1	0
P000508409	张雪松	1	47	5	2	28.4005	2	1	2	2	2	2	2	2	2	2	2	2	2	2	2	1	1	2	#NULL!	#NULL!	#NULL!	2018-03-23	125.7	0	0	2021-03-21	1093	0	0
P000511329	苏锦崙	2	54	5	2	21.875	1	1	1	2	2	2	1	2	1	2	2	1	1	1	1	2	1	1	2	2	2	2018-03-23	189.3	0	0	2021-03-21	1093	0	0
P000514804	王毅梅	2	73	4	2	22.2222	1	1	2	2	2	2	2	2	1	2	2	1	1	1	1	2	1	1	2	2	2	2018-03-23	61.4	2	1	2021-03-21	1093	1	0
P000514805	张秀清	2	57	4	2	23.7812	2	1	1	1	1	1	1	1	1	1	1	1	1	1	1	1	1	1	2	2	2	2018-03-23	91.9	1	0	2021-03-21	1093	1	0
P000514884	蒋洪义	1	56	4	2	22.3435	1	2	2	2	2	2	2	2	2	2	2	2	2	2	1	1	1	2	#NULL!	#NULL!	#NULL!	2018-03-23	65.4	2	1	2021-03-21	1093	2	0
P000516212	张晓虹	2	46	4	2	22.4766	1	1	2	2	2	2	2	2	2	2	2	2	1	1	1	1	1	1	2	1	2	2018-03-23	163.6	0	0	2021-03-21	1093	0	0
P000516329	解爱玲	2	65	3	1	23.4375	1	1	1	2	1	2	2	2	2	2	2	2	2	2	1	1	1	1	2	1	2	2018-03-23	134.2	0	0	2021-03-21	1093	0	0
